# Supplementary material for: Synthesis and computational evaluation of the antioxidant activity of pyrrolo[2,3-b]quinoxaline derivatives
Source: Royal Society of Chemistry journal article supplement (doi:10.1039/d4ra03108c), 2024-01-01
Supplement: d4ra03108c1.pdf [file d4ra03108c1.pdf]

## Supporting Information (SI)

# Synthesis and computational evaluation of the antioxidant activity of pyrrolo[2,3-*b*]quinoxaline derivatives

Nguyen Tran Nguyen<sup>1\*</sup>, Vo Viet Dai<sup>1</sup>, Adam Mechler<sup>2</sup>, Luc Van Meervelt<sup>3</sup>, Nguyen Thi Hoa<sup>4</sup> and Quan V. Vo<sup>4\*</sup>

<sup>1</sup>The University of Danang-University of Science and Education, Danang 550000, Vietnam.

<sup>2</sup>Department of Biochemistry and Chemistry, La Trobe University, Victoria 3086, Australia.

<sup>3</sup>Biomolecular Architecture, Department of Chemistry, KU Leuven, Celestijnenlaan 200F, B-3001 Leuven, Belgium

<sup>4</sup>The University of Danang - University of Technology and Education, Danang 550000, Vietnam.

\*Corresponding authors: [ntnguyen@ued.udn.vn](mailto:ntnguyen@ued.udn.vn); [vvquan@ute.udn.vn](mailto:vvquan@ute.udn.vn)

### Table of Contents

|                                                                                                                                                        |     |
|--------------------------------------------------------------------------------------------------------------------------------------------------------|-----|
| Table S1. The method to calculate rate constant following the conventional transition state theory .....                                               | S3  |
| Figure S1. <sup>1</sup> H NMR spectrum of ethyl 1,2-diphenyl-1H-pyrrolo[2,3- <i>b</i> ]quinoxaline-3-carboxylate (3a) .....                            | S5  |
| Figure S2. <sup>13</sup> C NMR spectrum of ethyl 1,2-diphenyl-1H-pyrrolo[2,3- <i>b</i> ]quinoxaline-3-carboxylate (3a) .....                           | S5  |
| Figure S3. ESI-HRMS spectrum of ethyl 1,2-diphenyl-1H-pyrrolo[2,3- <i>b</i> ]quinoxaline-3-carboxylate (3a) .....                                      | S6  |
| Figure S4. <sup>1</sup> H NMR spectrum of ethyl 1,2-diphenyl-2,4-dihydro-1H-pyrrolo[2,3- <i>b</i> ]quinoxaline-3-carboxylate (3a') .....               | S6  |
| Figure S5. <sup>13</sup> C NMR spectrum of ethyl 1,2-diphenyl-2,4-dihydro-1H-pyrrolo[2,3- <i>b</i> ]quinoxaline-3-carboxylate (3a') .....              | S7  |
| Figure S6. ESI-HRMS spectrum of ethyl 1,2-diphenyl-2,4-dihydro-1H-pyrrolo[2,3- <i>b</i> ]quinoxaline-3-carboxylate (3a') .....                         | S7  |
| Figure S7. <sup>1</sup> H NMR spectrum of ethyl 1-(3-nitrophenyl)-2-( <i>p</i> -tolyl)-1H-pyrrolo[2,3- <i>b</i> ]quinoxaline-3-carboxylate (3b) .....  | S8  |
| Figure S8. <sup>13</sup> C NMR spectrum of ethyl 1-(3-nitrophenyl)-2-( <i>p</i> -tolyl)-1H-pyrrolo[2,3- <i>b</i> ]quinoxaline-3-carboxylate (3b) ..... | S8  |
| Figure S9. ESI-HRMS spectrum of ethyl 1-(3-nitrophenyl)-2-( <i>p</i> -tolyl)-1H-pyrrolo[2,3- <i>b</i> ]quinoxaline-3-carboxylate (3b) .....            | S9  |
| Figure S10. <sup>1</sup> H NMR spectrum of ethyl 2-(4-nitrophenyl)-1-phenyl-1H-pyrrolo[2,3- <i>b</i> ]quinoxaline-3-carboxylate (3c) .....             | S10 |

|                                                                                                                                                                   |     |
|-------------------------------------------------------------------------------------------------------------------------------------------------------------------|-----|
| Figure S11. <sup>13</sup> C NMR spectrum of ethyl 2-(4-nitrophenyl)-1-phenyl-1H-pyrrolo[2,3- <i>b</i> ]quinoxaline-3-carboxylate (3c).....                        | S10 |
| Figure S12. ESI-HRMS spectrum of ethyl 2-(4-nitrophenyl)-1-phenyl-1H-pyrrolo[2,3- <i>b</i> ]quinoxaline-3-carboxylate (3c).....                                   | S10 |
| Figure S13. <sup>1</sup> H NMR spectrum of ethyl 1-phenyl-2-( <i>p</i> -tolyl)-1H-pyrrolo[2,3- <i>b</i> ]quinoxaline-3-carboxylate (3d).....                      | S11 |
| Figure S14. <sup>13</sup> C NMR spectrum of ethyl 1-phenyl-2-( <i>p</i> -tolyl)-1H-pyrrolo[2,3- <i>b</i> ]quinoxaline-3-carboxylate (3d).....                     | S11 |
| Figure S15. ESI-HRMS spectrum of ethyl 1-phenyl-2-( <i>p</i> -tolyl)-1H-pyrrolo[2,3- <i>b</i> ]quinoxaline-3-carboxylate (3d).....                                | S12 |
| Figure S16. <sup>1</sup> H NMR spectrum of ethyl 1-benzyl-2-(4-nitrophenyl)-1H-pyrrolo[2,3- <i>b</i> ]quinoxaline-3-carboxylate (3e).....                         | S12 |
| Figure S17. <sup>13</sup> C NMR spectrum of ethyl 1-benzyl-2-(4-nitrophenyl)-1H-pyrrolo[2,3- <i>b</i> ]quinoxaline-3-carboxylate (3e).....                        | S13 |
| Figure S18. ESI-HRMS spectrum of ethyl 1-benzyl-2-(4-nitrophenyl)-1H-pyrrolo[2,3- <i>b</i> ]quinoxaline-3-carboxylate (3e).....                                   | S13 |
| Figure S19. Partial crystal packing of X showing the chain formation along the <i>c</i> direction by C-H...O hydrogen bonding and C-H... $\pi$ interactions. .... | S14 |
| Table S2. Crystal data and structure refinement details for 3a .....                                                                                              | S15 |
| Table S3: The Cartesian coordinates and energies of TS of the reaction between 4b with HO <sup>•</sup> and HOO <sup>•</sup> in the studied environments. ....     | S17 |
| References .....                                                                                                                                                  | 44  |

**Table S1. The method to calculate rate constant following the conventional transition state theory**

The rate constant ( $k$ ) was calculated by using the conventional transition state theory (TST) (at 298.15 K, 1M standard state) according to the equation (1):

$$k = \sigma \kappa \frac{k_B T}{h} e^{-(\Delta G^\ddagger)/RT} \quad (1)$$

Where:  $\sigma$  is the reaction symmetry number,<sup>1,2</sup>

$\kappa$  contains the tunneling corrections calculated using the Eckart barrier,<sup>3</sup>

$k_B$  is the Boltzmann constant,

$h$  is the Planck constant,

$\Delta G^\ddagger$  is the Gibbs free energy of activation.

The Marcus Theory was used to estimate the reaction barriers of SET reactions.<sup>4-7</sup> The free energy of reaction  $\Delta G^\ddagger$  for the SET pathway was computed following the equations (2,3).

$$\Delta G_{\text{SET}}^\ddagger = \frac{\lambda}{4} \left( 1 + \frac{\Delta G_{\text{SET}}^0}{\lambda} \right)^2 \quad (2)$$

$$\lambda \approx \Delta E_{\text{SET}} - \Delta G_{\text{SET}}^0 \quad (3)$$

where  $\Delta G_{\text{SET}}$  is the Gibbs energy of reaction,  $\Delta E_{\text{SET}}$  is the non-adiabatic energy difference between reactants and vertical products for SET.<sup>8,9</sup>

For rate constants that were close to the diffusion limit a correction was applied to yield realistic results<sup>10</sup>. The apparent rate constants ( $k_{\text{app}}$ ) were calculated following the Collins–Kimball theory in the solvents at 298.15K;<sup>11</sup> the steady-state Smoluchowski rate constant ( $k_D$ ) for an irreversible bimolecular diffusion–controlled reaction was calculated following the literature as corroding to equations (4,5).<sup>10,12</sup>

$$k_{\text{app}} = \frac{k_{\text{TST}} k_D}{k_{\text{TST}} + k_D} \quad (4)$$

$$k_D = 4\pi R_{AB} D_{AB} N_A \quad (5)$$

where  $R_{AB}$  is the reaction distance,  $N_A$  is the Avogadro constant, and  $D_{AB} = D_A + D_B$  ( $D_{AB}$  is the mutual diffusion coefficient of the reactants A and B),<sup>11,13</sup> where  $D_A$  or  $D_B$  is estimated using the Stokes–Einstein formulation (6).<sup>14,15</sup>

$$D_{A \text{ or } B} = \frac{k_B T}{6\pi\eta a_{A \text{ or } B}} \quad (6)$$

$\eta$  is the viscosity of the solvents ( $\eta(\text{pentyl ethanoate}) = 8.62 \times 10^{-4}$  Pa s) and  $a$  is the radius of the solute.

The kinetic study requires different considerations. Pentyl ethanoate ( $\epsilon = 4.73$ ) are the *de facto* standard solvents in the literature to mimic the nonpolar environments in the human body.<sup>10,16-18</sup> Thus, this solvent was used to model the physiological environments. The solvent cage effects were included following the corrections proposed by Okuno,<sup>19</sup> adjusted with the free volume theory according to the Benson correction<sup>10,20-22</sup> to reduce over-penalizing entropy losses in solution. For the species that have multiple conformers, all of these were investigated and the conformer with the lowest electronic energy was included in the analysis.<sup>17,18</sup> The hindered internal rotation treatment was also applied to the single bonds to ensure that the obtained conformer has the lowest electronic energy.<sup>18,23</sup> All transition states were characterized by the existence of only one single imaginary frequency. Intrinsic coordinate calculations (IRCs) were performed to ensure that each transition state is connected correctly with the pre-complex and post-complex.

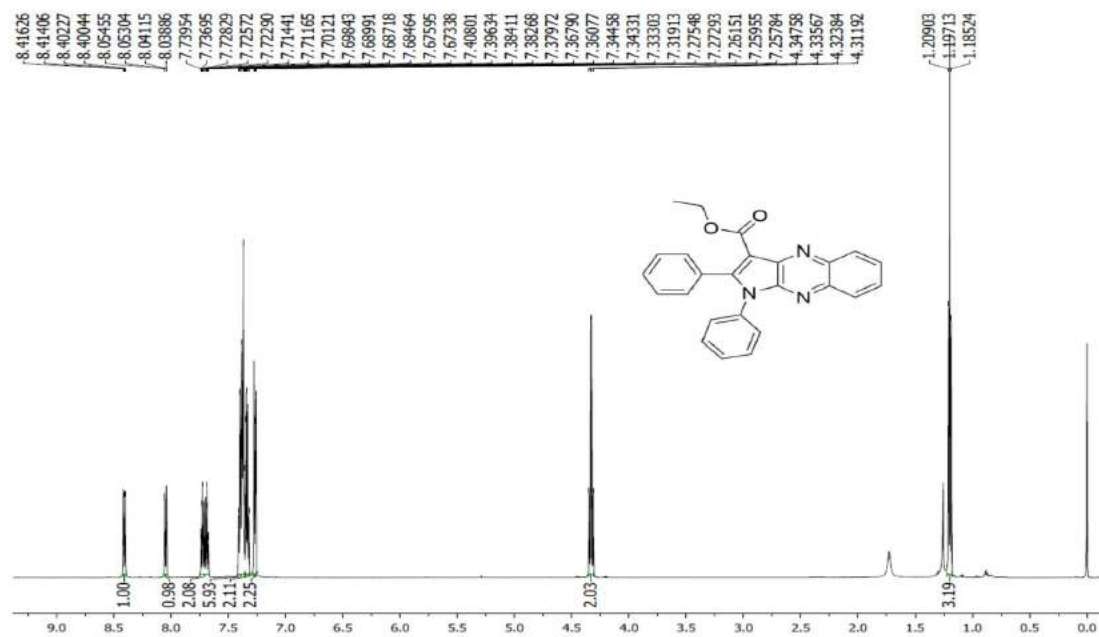

Figure S1. <sup>1</sup>H NMR spectrum of ethyl 1,2-diphenyl-1H-pyrrolo[2,3-b]quinoxaline-3-carboxylate (3a)

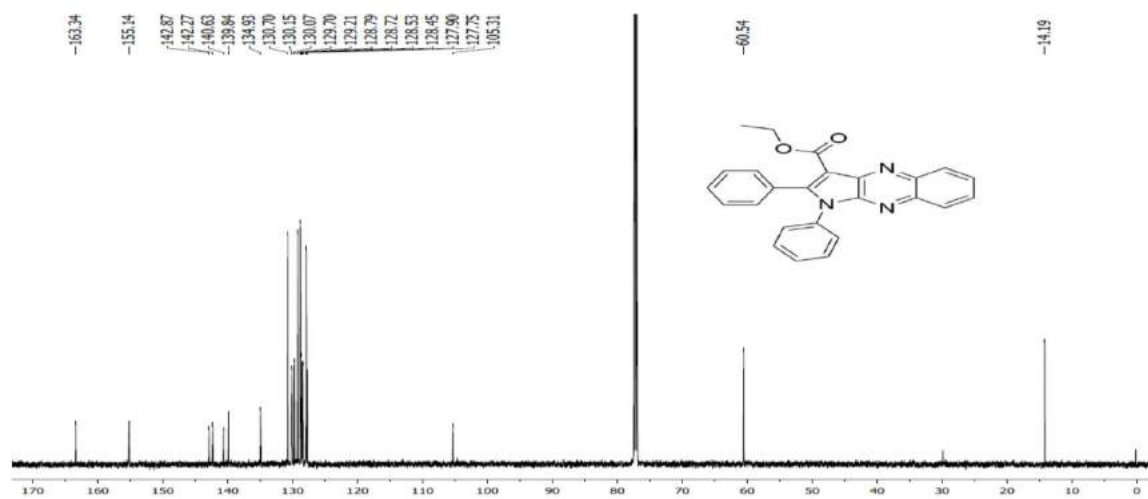

Figure S2. <sup>13</sup>C NMR spectrum of ethyl 1,2-diphenyl-1H-pyrrolo[2,3-b]quinoxaline-3-carboxylate (3a)

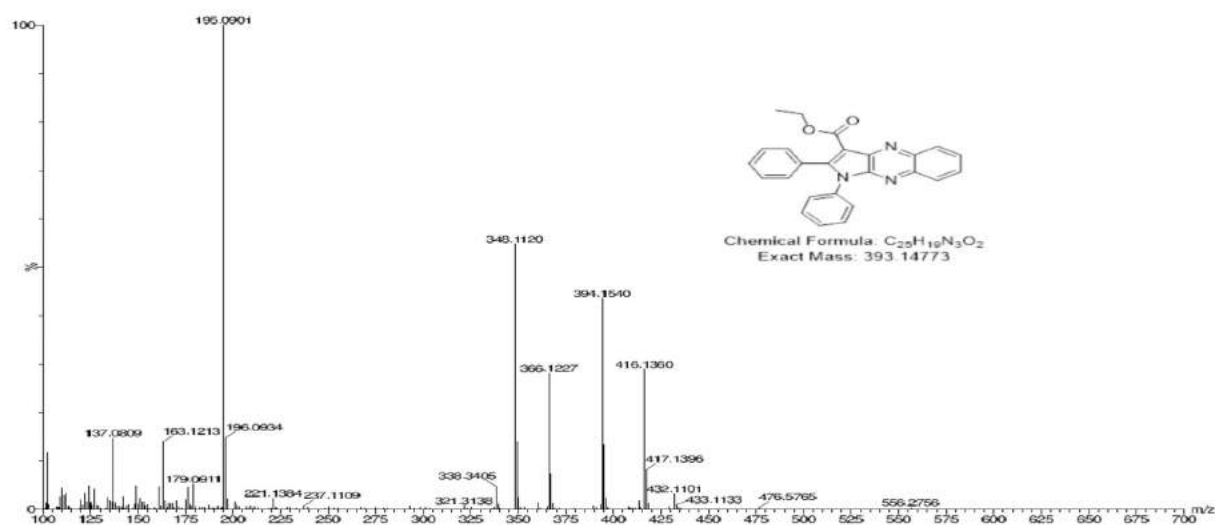

**Figure S3.** ESI-HRMS spectrum of ethyl 1,2-diphenyl-1H-pyrrolo[2,3-*b*]quinoxaline-3-carboxylate (**3a**)

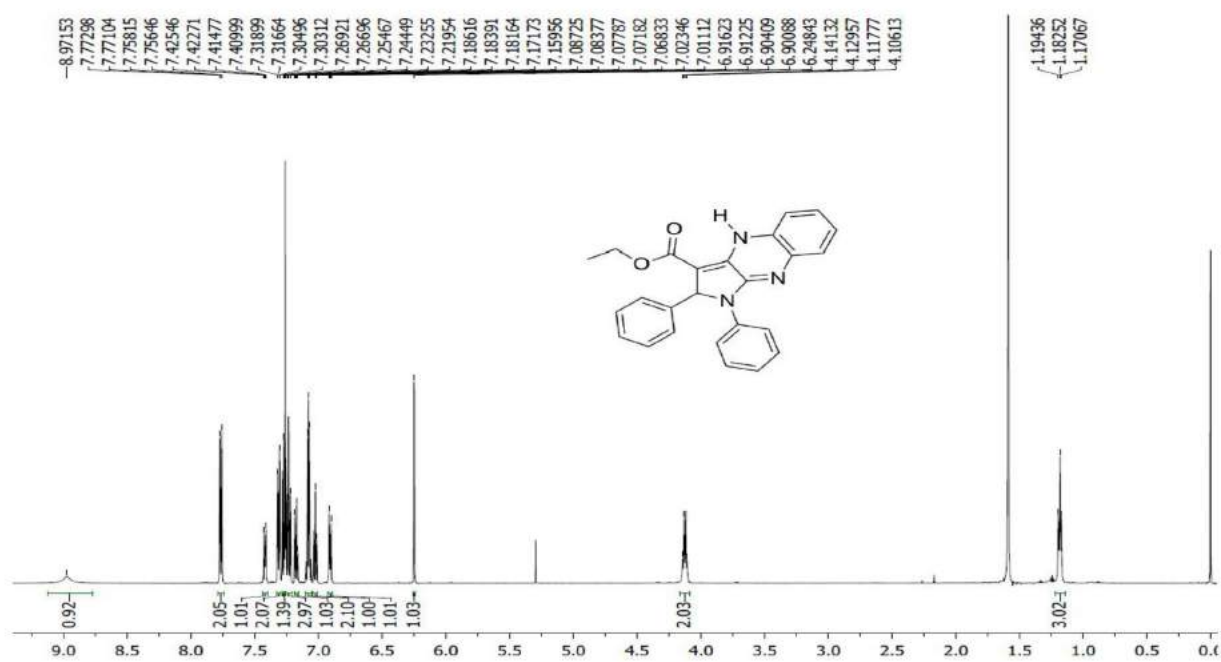

**Figure S4.**  $^1H$  NMR spectrum of ethyl 1,2-diphenyl-2,4-dihydro-1H-pyrrolo[2,3-*b*]quinoxaline-3-carboxylate (**3a'**)

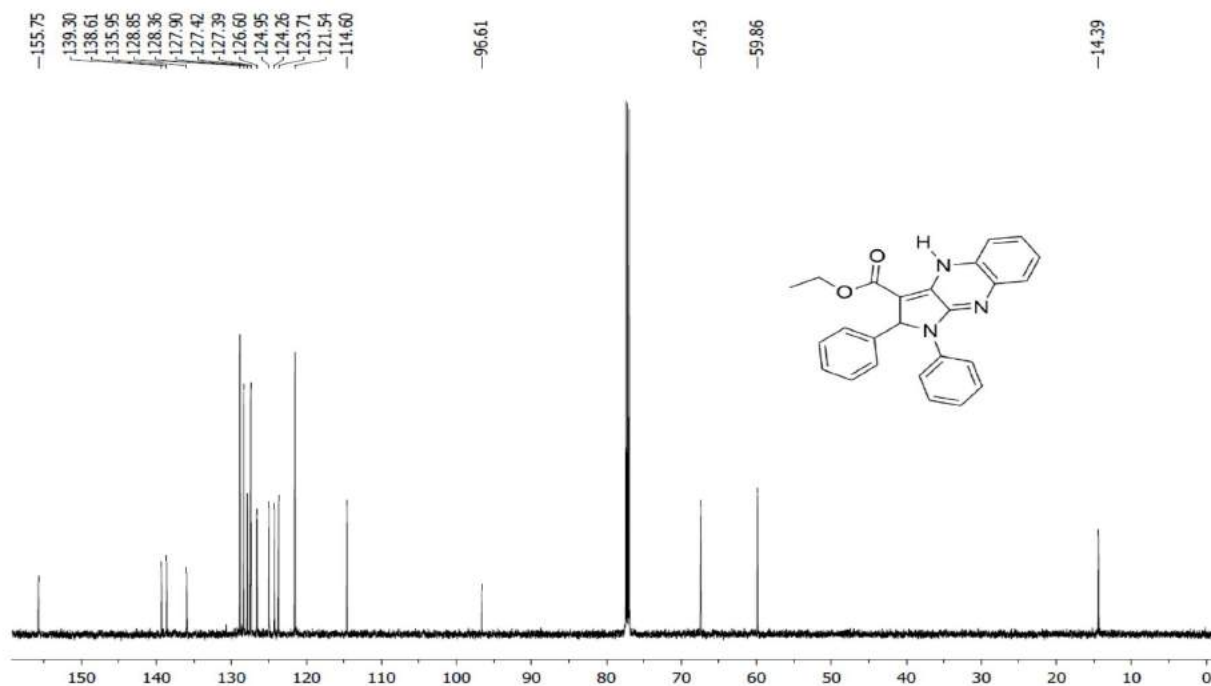

**Figure S5.**  $^{13}\text{C}$  NMR spectrum of ethyl 1,2-diphenyl-2,4-dihydro-1H-pyrrolo[2,3-*b*]quinoxaline-3-carboxylate (3a')

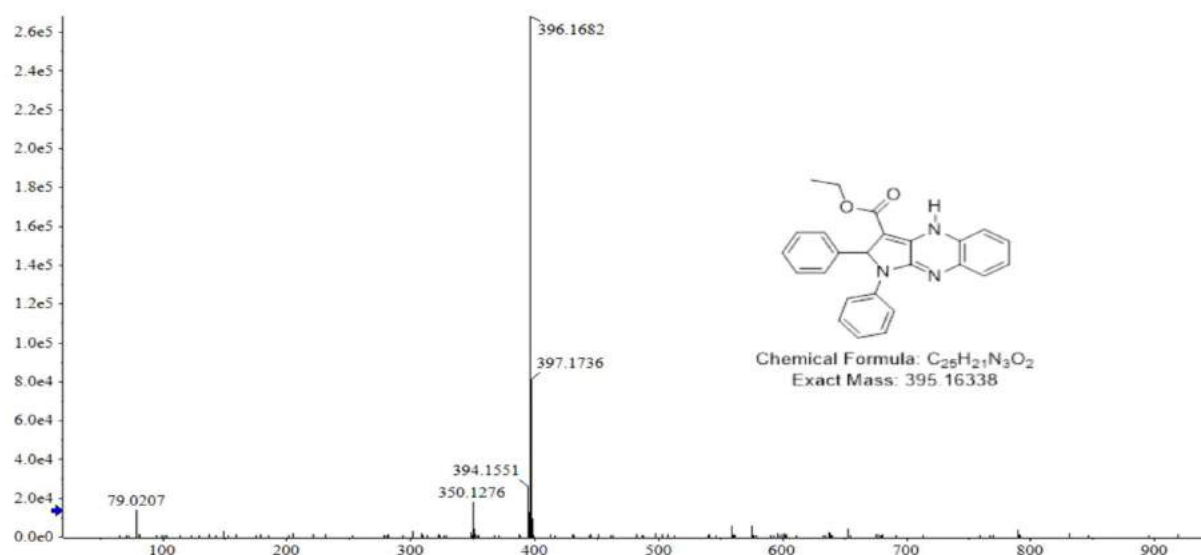

**Figure S6.** ESI-HRMS spectrum of ethyl 1,2-diphenyl-2,4-dihydro-1H-pyrrolo[2,3-*b*]quinoxaline-3-carboxylate (3a')

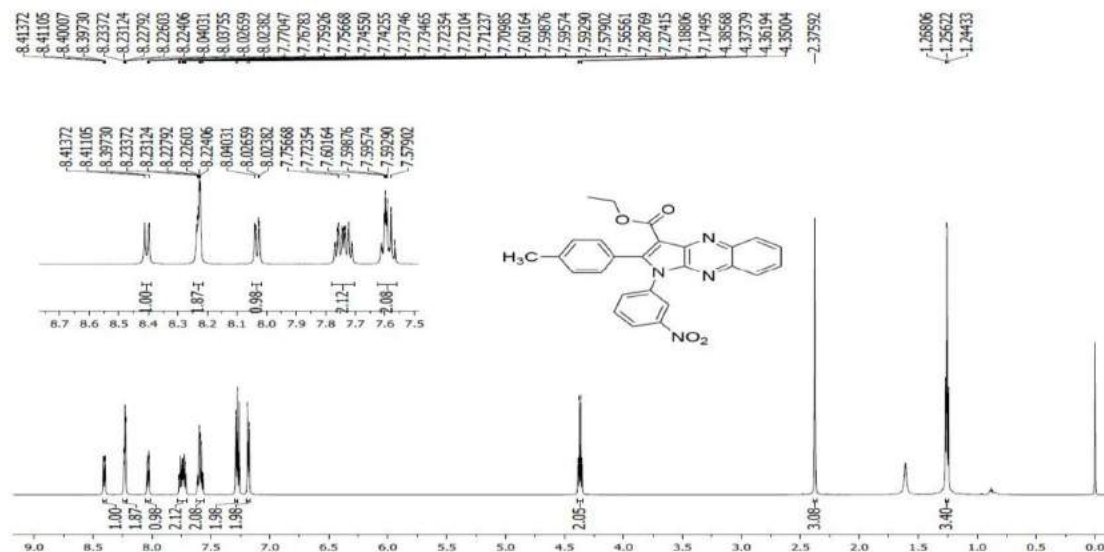

Figure S7. <sup>1</sup>H NMR spectrum of ethyl 1-(3-nitrophenyl)-2-(p-tolyl)-1H-pyrrolo[2,3-*b*]quinoxaline-3-carboxylate (3b)

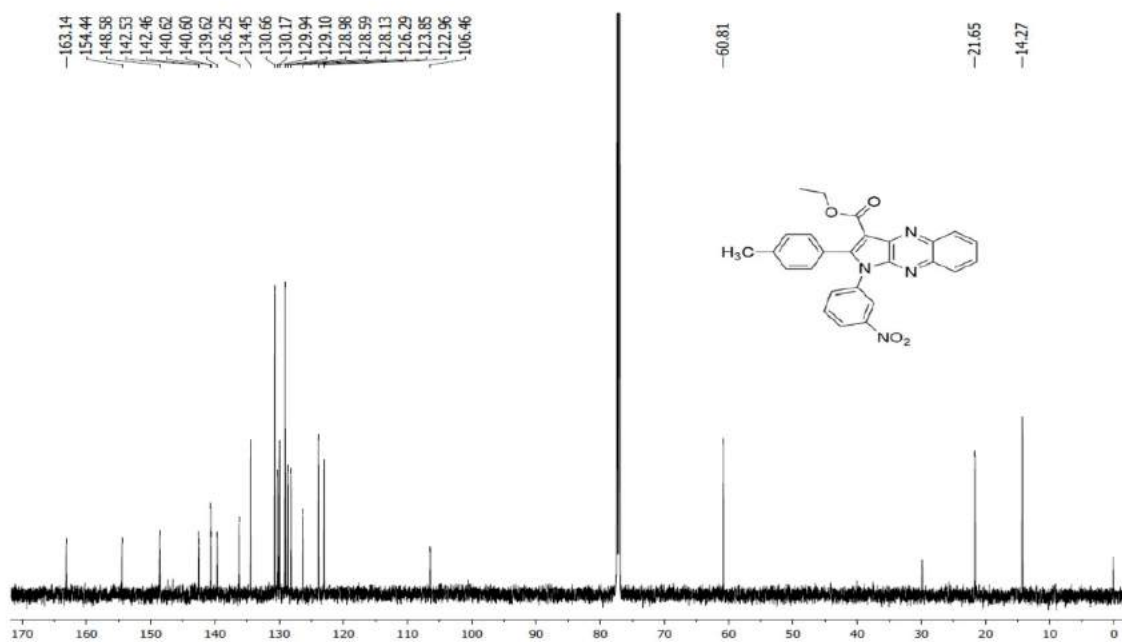

Figure S8. <sup>13</sup>C NMR spectrum of ethyl 1-(3-nitrophenyl)-2-(p-tolyl)-1H-pyrrolo[2,3-*b*]quinoxaline-3-carboxylate (3b)



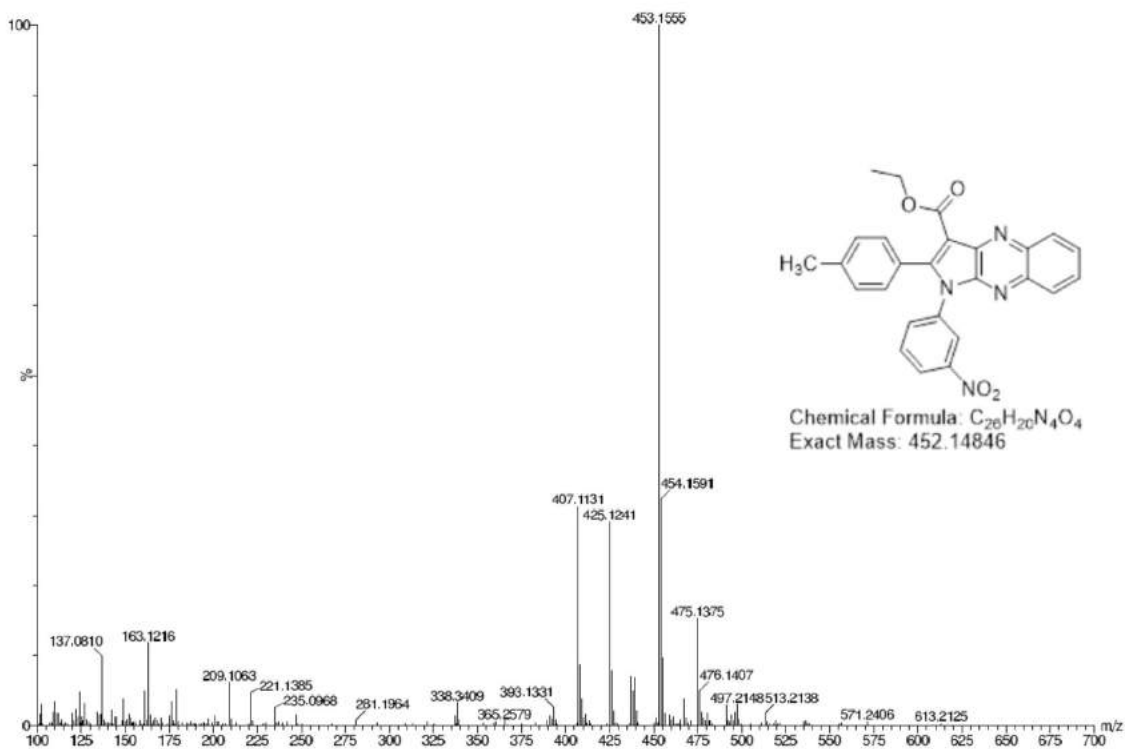

**Figure S9. ESI-HRMS spectrum of ethyl 1-(3-nitrophenyl)-2-(p-tolyl)-1H-pyrrolo[2,3-*b*]quinoxaline-3-carboxylate (3b)**

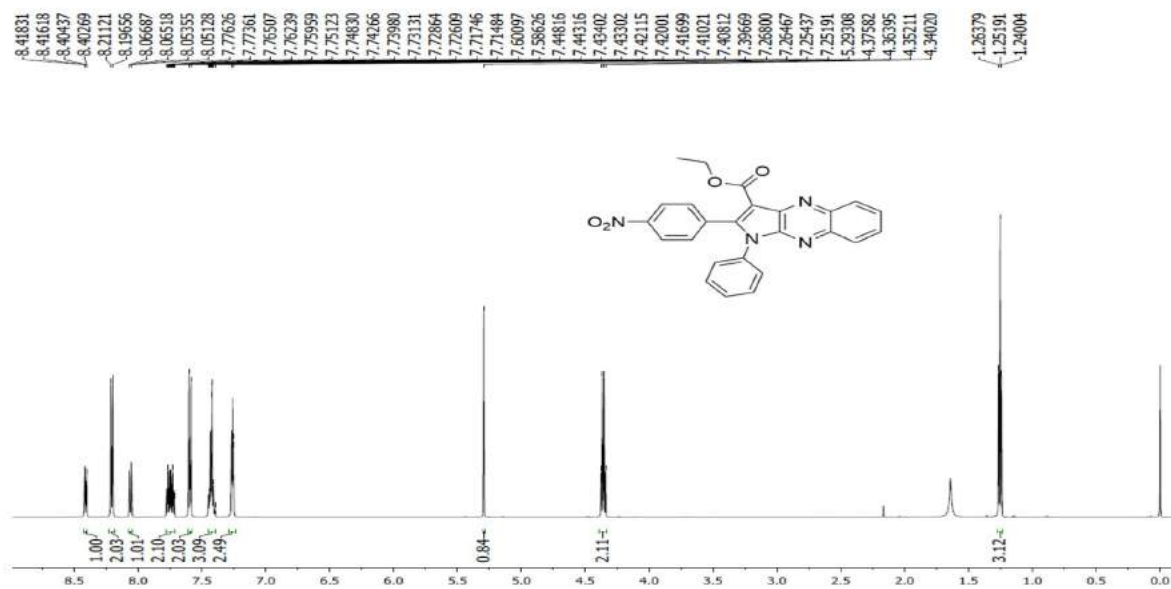

Figure S10.  $^1\text{H}$  NMR spectrum of ethyl 2-(4-nitrophenyl)-1-phenyl-1H-pyrrolo[2,3-*b*]quinoxaline-3-carboxylate (3c)

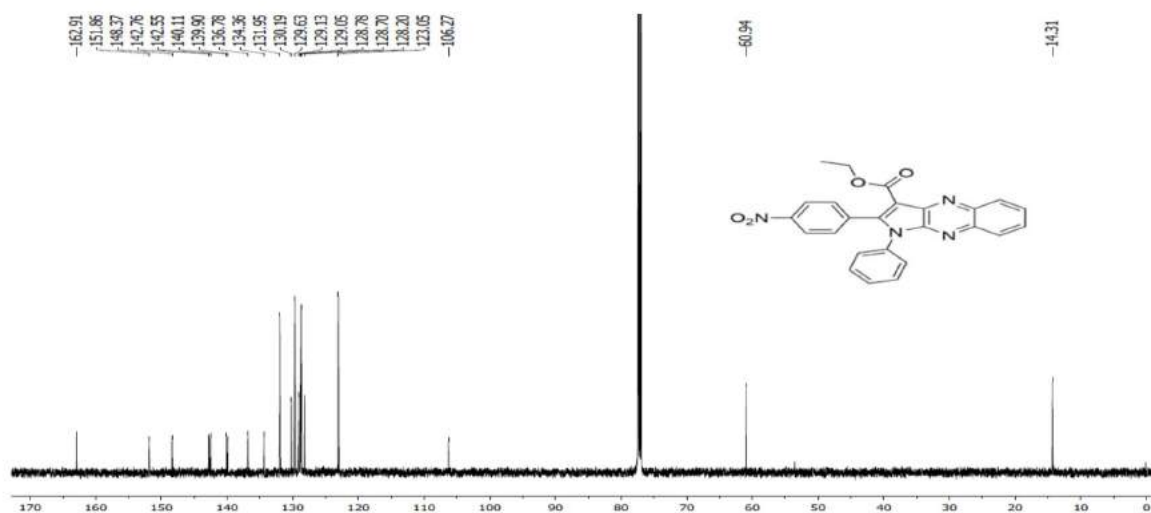

Figure S11.  $^{13}\text{C}$  NMR spectrum of ethyl 2-(4-nitrophenyl)-1-phenyl-1H-pyrrolo[2,3-*b*]quinoxaline-3-carboxylate (3c)

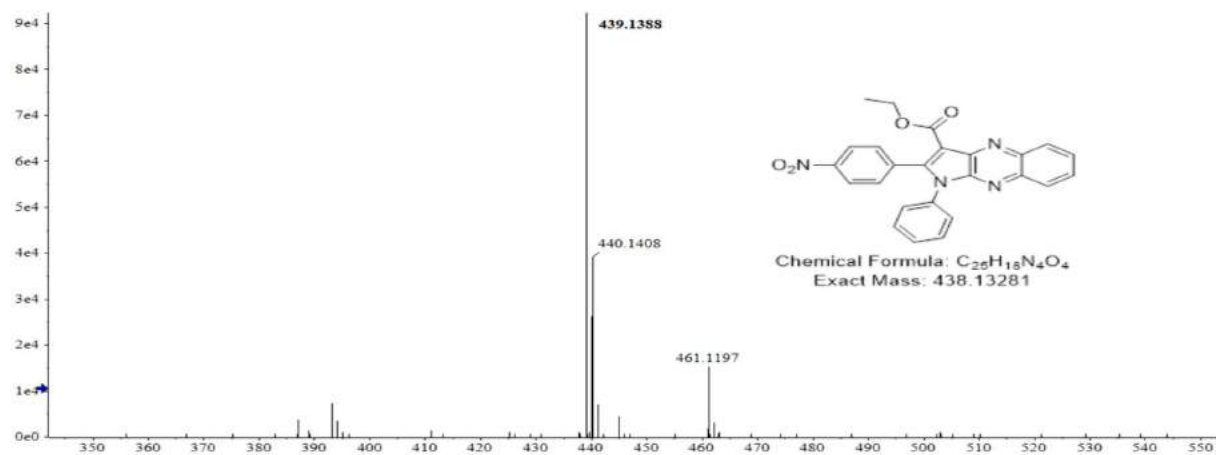

Figure S12. ESI-HRMS spectrum of ethyl 2-(4-nitrophenyl)-1-phenyl-1H-pyrrolo[2,3-*b*]quinoxaline-3-carboxylate (3c)

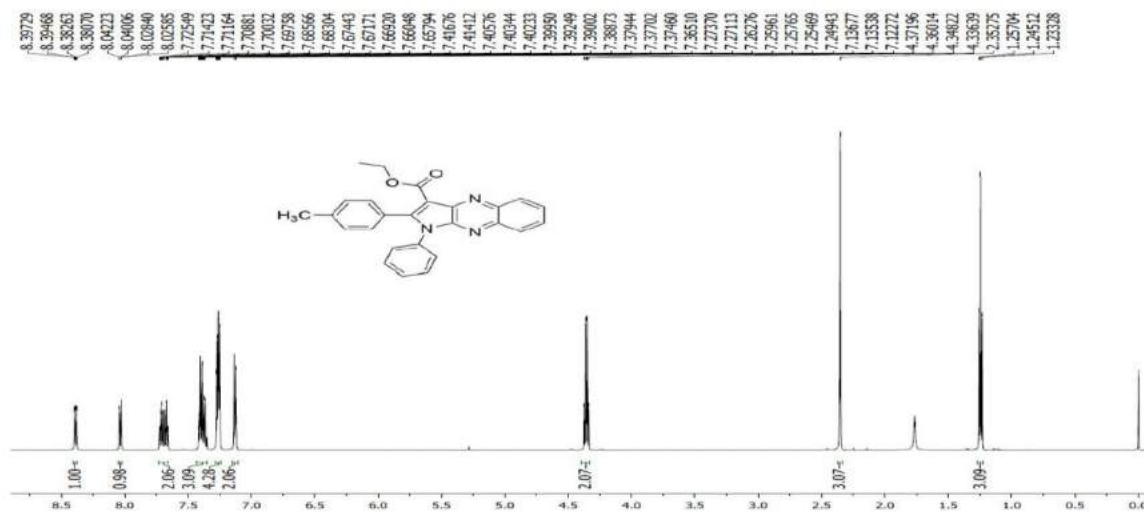

Figure S13. <sup>1</sup>H NMR spectrum of ethyl 1-phenyl-2-(p-tolyl)-1H-pyrrolo[2,3-b]quinoxaline-3-carboxylate (3d)

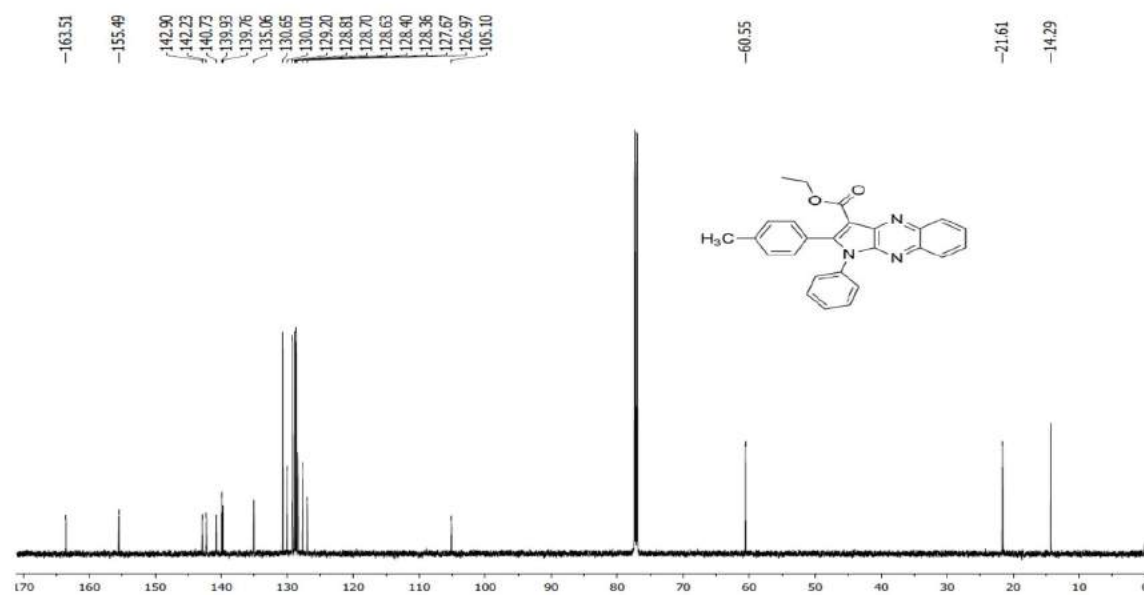

Figure S14. <sup>13</sup>C NMR spectrum of ethyl 1-phenyl-2-(p-tolyl)-1H-pyrrolo[2,3-b]quinoxaline-3-carboxylate (3d)

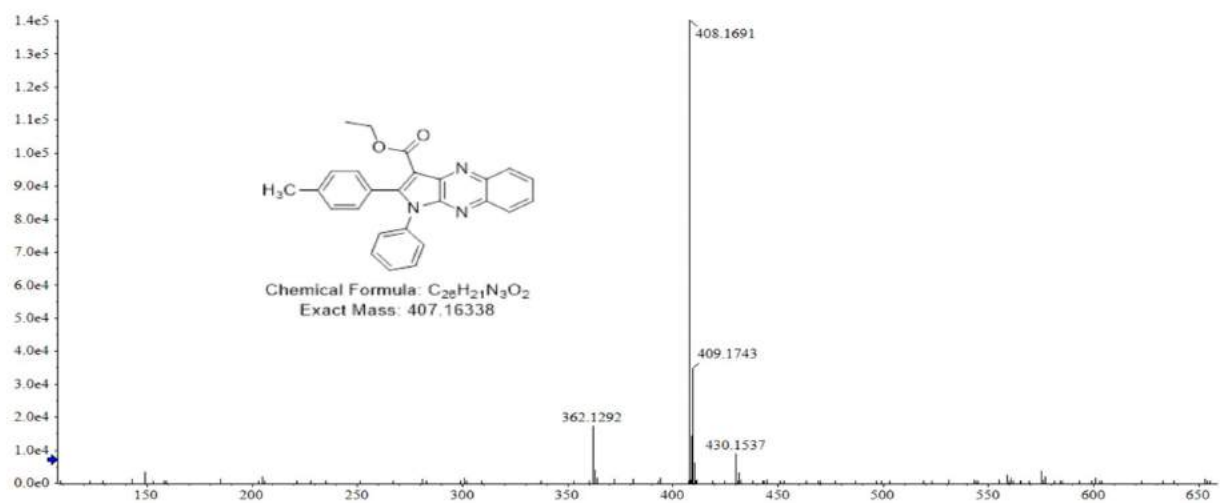

**Figure S15.** ESI-HRMS spectrum of ethyl 1-phenyl-2-(p-tolyl)-1H-pyrrolo[2,3-*b*]quinoxaline-3-carboxylate (**3d**)

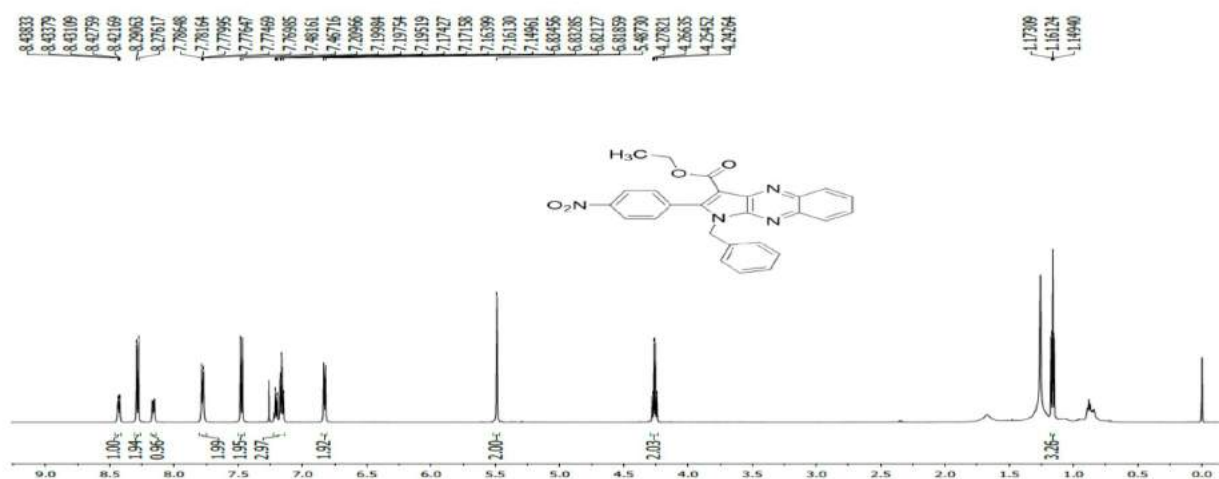

**Figure S16.** <sup>1</sup>H NMR spectrum of ethyl 1-benzyl-2-(4-nitrophenyl)-1H-pyrrolo[2,3-*b*]quinoxaline-3-carboxylate (**3e**)

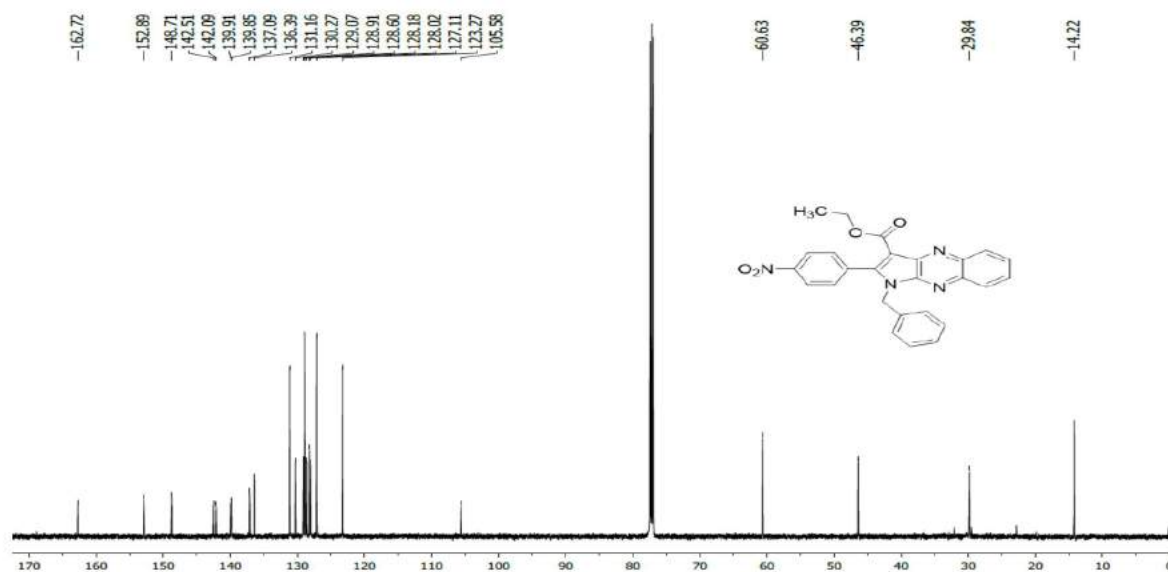

**Figure S17.**  $^{13}\text{C}$  NMR spectrum of ethyl 1-benzyl-2-(4-nitrophenyl)-1H-pyrrolo[2,3-*b*]quinoxaline-3-carboxylate (**3e**)

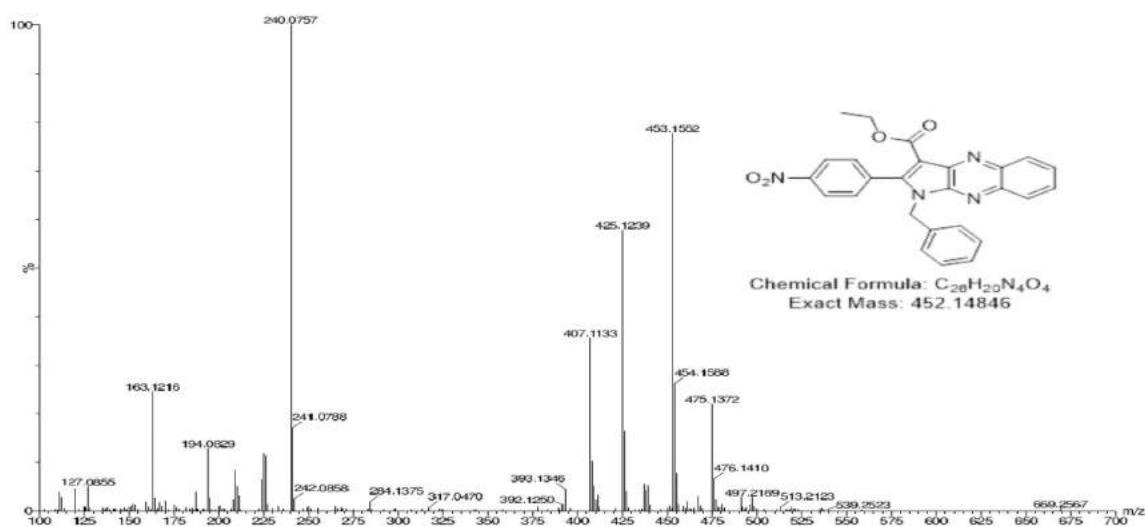

**Figure S18.** ESI-HRMS spectrum of ethyl 1-benzyl-2-(4-nitrophenyl)-1H-pyrrolo[2,3-*b*]quinoxaline-3-carboxylate (**3e**)

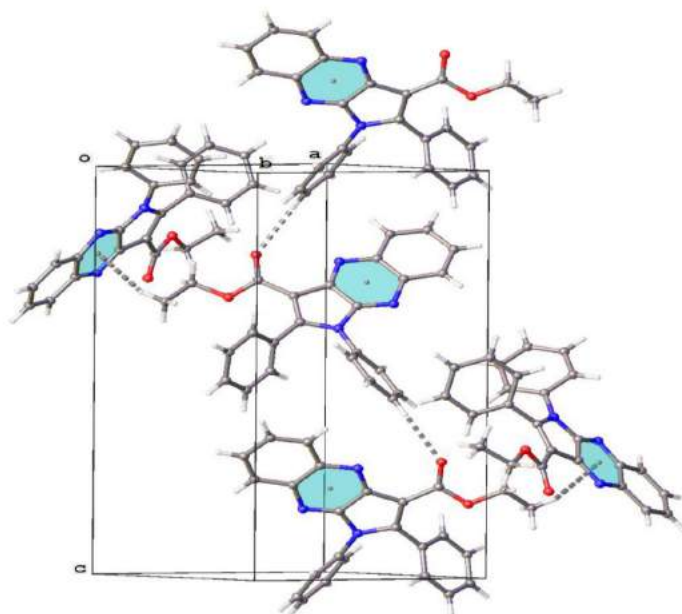

**Figure S19.** Partial crystal packing of X showing the chain formation along the *c* direction by C-H...O hydrogen bonding and C-H... $\pi$  interactions.

**Table S2. Crystal data and structure refinement details for 3a**

|                                  |                                                               |
|----------------------------------|---------------------------------------------------------------|
| Empirical formula                | C <sub>25</sub> H <sub>19</sub> N <sub>3</sub> O <sub>2</sub> |
| Formula weight                   | 393.43                                                        |
| Temperature/K                    | 293(2)                                                        |
| Crystal system                   | orthorhombic                                                  |
| Space group                      | <i>P</i> 2 <sub>1</sub> 2 <sub>1</sub> 2 <sub>1</sub>         |
| <i>a</i> /Å                      | 9.7669(5)                                                     |
| <i>b</i> /Å                      | 10.7587(8)                                                    |
| <i>c</i> /Å                      | 18.6574(14)                                                   |
| $\alpha$ /°                      | 90                                                            |
| $\beta$ /°                       | 90                                                            |
| $\gamma$ /°                      | 90                                                            |
| Volume/Å <sup>3</sup>            | 1960.5(2)                                                     |
| <i>Z</i>                         | 4                                                             |
| $\rho_{\text{calc}}/\text{cm}^3$ | 1.333                                                         |
| $\mu/\text{mm}^{-1}$             | 0.086                                                         |
| <i>F</i> (000)                   | 824.0                                                         |
| Crystal size/mm <sup>3</sup>     | 0.5 × 0.3 × 0.15                                              |

|                                                |                                                               |
|------------------------------------------------|---------------------------------------------------------------|
| Radiation                                      | Mo K $\alpha$ ( $\lambda = 0.71073 \text{ \AA}$ )             |
| 2 $\theta$ range for data collection/ $^\circ$ | 5.634 to 52.734                                               |
| Index ranges                                   | $-12 \leq h \leq 12, -12 \leq k \leq 13, -23 \leq l \leq 23$  |
| Reflections collected                          | 11625                                                         |
| Independent reflections                        | 4001 [ $R_{\text{int}} = 0.0318, R_{\text{sigma}} = 0.0439$ ] |
| Data/restraints/parameters                     | 4001/0/272                                                    |
| Goodness-of-fit on $F^2$                       | 1.073                                                         |
| Final R indexes [ $I \geq 2\sigma(I)$ ]        | $R_1 = 0.0474, wR_2 = 0.0942$                                 |
| Final R indexes [all data]                     | $R_1 = 0.0682, wR_2 = 0.1066$                                 |
| Largest diff. peak/hole / $e \text{ \AA}^{-3}$ | 0.19/-0.19                                                    |
| Flack parameter                                | -0.1(8)                                                       |



**Table S3: The Cartesian coordinates and energies of TS of the reaction between 4b with HO<sup>\*</sup> and HOO<sup>\*</sup> in the studied environments.**

| Name                  |             |             |             | TS-C2-OH-RAF-G                               |                             |
|-----------------------|-------------|-------------|-------------|----------------------------------------------|-----------------------------|
| Cartesian Coordinates |             |             |             | Energy                                       |                             |
| C                     | 1.26397900  | -1.06735900 | 0.25955800  | Zero-point correction=                       | 0.399012 (Hartree/Particle) |
| C                     | 1.44900800  | 0.36878800  | 0.09418200  | Thermal correction to Energy=                | 0.424821                    |
| N                     | 2.59252200  | 0.96313900  | -0.00202400 | Thermal correction to Enthalpy=              | 0.425765                    |
| C                     | 3.65457100  | 0.10313400  | 0.00164300  | Thermal correction to Gibbs Free Energy=     | 0.340756                    |
| C                     | 3.48284500  | -1.32509700 | -0.02284800 | Sum of electronic and zero-point Energies=   | -1353.977417                |
| N                     | 2.27492100  | -1.91339500 | 0.03329500  | Sum of electronic and thermal Energies=      | -1353.951608                |
| C                     | -0.16830900 | -1.29547900 | 0.13143400  | Sum of electronic and thermal Enthalpies=    | -1353.950664                |
| C                     | -0.76584000 | -0.07266800 | 0.04706500  | Sum of electronic and thermal Free Energies= | -1354.035673                |
| N                     | 0.19941600  | 0.94305800  | 0.03090900  |                                              |                             |
| C                     | -0.80467800 | -2.60770400 | 0.30528900  |                                              |                             |
| C                     | -2.20492800 | 0.24323500  | 0.01611100  |                                              |                             |
| C                     | 4.96203500  | 0.63632600  | -0.04937400 |                                              |                             |
| C                     | 6.04879200  | -0.19523900 | -0.12839500 |                                              |                             |
| C                     | 5.88575200  | -1.60436300 | -0.17574000 |                                              |                             |
| C                     | 4.63691500  | -2.15408400 | -0.13094400 |                                              |                             |
| C                     | -2.73372600 | 1.06966700  | -0.97619800 |                                              |                             |
| C                     | -4.09547300 | 1.34377700  | -0.99924600 |                                              |                             |
| C                     | -4.93324900 | 0.80509400  | -0.02729500 |                                              |                             |
| C                     | -4.40719400 | -0.01212200 | 0.96925400  |                                              |                             |
| C                     | -3.04739900 | -0.29473700 | 0.99036100  |                                              |                             |
| C                     | -0.03977500 | 2.34941500  | 0.07703900  |                                              |                             |
| C                     | -0.84979700 | 2.88238200  | 1.07517400  |                                              |                             |
| C                     | -1.08755600 | 4.25072500  | 1.10074800  |                                              |                             |
| C                     | -0.50401900 | 5.08117600  | 0.14856800  |                                              |                             |
| C                     | 0.32068100  | 4.54061100  | -0.83265000 |                                              |                             |
| C                     | 0.55280800  | 3.17080800  | -0.87625800 |                                              |                             |
| O                     | -0.36534100 | -3.46506600 | 1.03079200  |                                              |                             |
| O                     | -1.92909200 | -2.73578000 | -0.40750800 |                                              |                             |
| C                     | -2.70337700 | -3.91952900 | -0.16253700 |                                              |                             |
| C                     | -3.97053900 | -3.78927500 | -0.97708500 |                                              |                             |
| H                     | 5.06637200  | 1.71415100  | -0.02506800 |                                              |                             |
| H                     | 7.04676000  | 0.22561800  | -0.16122300 |                                              |                             |
| H                     | 6.75948000  | -2.24083800 | -0.24343000 |                                              |                             |
| H                     | 4.47527700  | -3.22492000 | -0.15555300 |                                              |                             |
| H                     | -2.07865700 | 1.49231200  | -1.72969700 |                                              |                             |
| H                     | -4.50221300 | 1.98010300  | -1.77580200 |                                              |                             |
| H                     | -5.99400800 | 1.02549100  | -0.04394200 |                                              |                             |
| H                     | -5.05528600 | -0.42581700 | 1.73268400  |                                              |                             |
| H                     | -2.62750400 | -0.92332100 | 1.76854100  |                                              |                             |
| H                     | -1.28562600 | 2.22614500  | 1.81882600  |                                              |                             |
| H                     | -1.72181600 | 4.66856000  | 1.87295600  |                                              |                             |
| H                     | -0.68669800 | 6.14860600  | 0.17564200  |                                              |                             |
| H                     | 0.78330500  | 5.18493500  | -1.57033900 |                                              |                             |
| H                     | 1.19400100  | 2.73445900  | -1.63142700 |                                              |                             |
| H                     | -2.11282400 | -4.79295600 | -0.44609400 |                                              |                             |
| H                     | -2.90761900 | -3.98716100 | 0.90900600  |                                              |                             |
| H                     | -4.61231300 | -4.65603600 | -0.80991500 |                                              |                             |
| H                     | -4.51408200 | -2.88730400 | -0.68982400 |                                              |                             |
| H                     | -3.73742000 | -3.72838900 | -2.04090600 |                                              |                             |
| O                     | 1.37456900  | -1.00346400 | 2.20105300  |                                              |                             |

|                              |             |             |             |                                                           |
|------------------------------|-------------|-------------|-------------|-----------------------------------------------------------|
| H                            | 1.19019500  | -1.95029300 | 2.32769300  |                                                           |
| <b>Name</b>                  |             |             |             | <b>TS-C4-OH-RAF-G</b>                                     |
| <b>Cartesian Coordinates</b> |             |             |             | <b>Energy</b>                                             |
| C                            | 1.28230300  | -1.10742000 | 0.18342200  | Zero-point correction= 0.398543 (Hartree/Particle)        |
| C                            | 1.45679500  | 0.32333300  | 0.06330900  | Thermal correction to Energy= 0.424542                    |
| N                            | 2.59709700  | 0.94319000  | -0.05930200 | Thermal correction to Enthalpy= 0.425486                  |
| C                            | 3.66781800  | 0.12612200  | 0.00719900  | Thermal correction to Gibbs Free Energy= 0.339743         |
| C                            | 3.52444300  | -1.29884700 | 0.29417700  | Sum of electronic and zero-point Energies= -1353.971544   |
| N                            | 2.29260900  | -1.92493600 | 0.22855700  | Sum of electronic and thermal Energies= -1353.945544      |
| C                            | -0.14233600 | -1.34258200 | 0.17563100  | Sum of electronic and thermal Enthalpies= -1353.944600    |
| C                            | -0.75350800 | -0.11558800 | 0.09372000  | Sum of electronic and thermal Free Energies= -1354.030344 |
| N                            | 0.20277800  | 0.89855400  | 0.02205900  |                                                           |
| C                            | -0.78769300 | -2.66757300 | 0.22390700  |                                                           |
| C                            | -2.19354700 | 0.19639700  | 0.09062600  |                                                           |
| C                            | 4.96556000  | 0.65649300  | -0.16550100 |                                                           |
| C                            | 6.05092700  | -0.17589300 | -0.21625000 |                                                           |
| C                            | 5.90786100  | -1.59075600 | -0.10532800 |                                                           |
| C                            | 4.68763300  | -2.14017400 | 0.11544400  |                                                           |
| C                            | -2.74360400 | 1.01411300  | -0.89740100 |                                                           |
| C                            | -4.10646600 | 1.28436000  | -0.89722200 |                                                           |
| C                            | -4.92451800 | 0.75213400  | 0.09456900  |                                                           |
| C                            | -4.37750500 | -0.05725100 | 1.08656200  |                                                           |
| C                            | -3.01754200 | -0.33771100 | 1.08306900  |                                                           |
| C                            | -0.03528900 | 2.30630000  | 0.05262900  |                                                           |
| C                            | -0.82417500 | 2.85727400  | 1.05782500  |                                                           |
| C                            | -1.05960600 | 4.22632300  | 1.06614400  |                                                           |
| C                            | -0.49544400 | 5.04008900  | 0.08853400  |                                                           |
| C                            | 0.30733300  | 4.48176600  | -0.90093100 |                                                           |
| C                            | 0.53730700  | 3.11132400  | -0.92648600 |                                                           |
| O                            | -0.33578500 | -3.62839000 | 0.78647300  |                                                           |
| O                            | -1.95220900 | -2.67588800 | -0.44511600 |                                                           |
| C                            | -2.73250200 | -3.87474700 | -0.34568300 |                                                           |
| C                            | -4.03001400 | -3.61168600 | -1.07704900 |                                                           |
| H                            | 5.05937900  | 1.72891600  | -0.28375600 |                                                           |
| H                            | 7.03896000  | 0.24266600  | -0.36806500 |                                                           |
| H                            | 6.78161600  | -2.22248500 | -0.20580700 |                                                           |
| H                            | 4.53175600  | -3.20902600 | 0.20015500  |                                                           |
| H                            | -2.10495200 | 1.43171000  | -1.66751400 |                                                           |
| H                            | -4.52903800 | 1.91317700  | -1.67143300 |                                                           |
| H                            | -5.98588700 | 0.97011800  | 0.09653000  |                                                           |
| H                            | -5.01009000 | -0.46846100 | 1.86419900  |                                                           |
| H                            | -2.58442500 | -0.96728800 | 1.85276500  |                                                           |
| H                            | -1.25056800 | 2.21549700  | 1.81934100  |                                                           |
| H                            | -1.67793000 | 4.65726800  | 1.84402000  |                                                           |
| H                            | -0.67634800 | 6.10804000  | 0.10168200  |                                                           |
| H                            | 0.75464000  | 5.11275000  | -1.65926400 |                                                           |
| H                            | 1.16211000  | 2.66204900  | -1.68767800 |                                                           |
| H                            | -2.16891100 | -4.70224900 | -0.78157000 |                                                           |
| H                            | -2.89408400 | -4.10140000 | 0.71123600  |                                                           |
| H                            | -4.68059700 | -4.48551600 | -1.01112500 |                                                           |
| H                            | -4.54450700 | -2.75442600 | -0.63856800 |                                                           |
| H                            | -3.83935200 | -3.39793600 | -2.12963500 |                                                           |
| O                            | 3.62845700  | -1.06089500 | 2.17044500  |                                                           |
| H                            | 3.24767600  | -1.91628300 | 2.42367700  |                                                           |

| Name                  |             |             |             | TS-C5-OH-RAF-G                               |                             |
|-----------------------|-------------|-------------|-------------|----------------------------------------------|-----------------------------|
| Cartesian Coordinates |             |             |             | Energy                                       |                             |
| C                     | 1.26808600  | -1.08283100 | 0.10258100  | Zero-point correction=                       | 0.398546 (Hartree/Particle) |
| C                     | 1.43935400  | 0.33737800  | -0.02697500 | Thermal correction to Energy=                | 0.424679                    |
| N                     | 2.58131100  | 0.95426700  | -0.09260600 | Thermal correction to Enthalpy=              | 0.425624                    |
| C                     | 3.65450100  | 0.12185300  | -0.04091000 | Thermal correction to Gibbs Free Energy=     | 0.338916                    |
| C                     | 3.50374500  | -1.29303400 | 0.05874100  | Sum of electronic and zero-point Energies=   | -1353.980661                |
| N                     | 2.29955800  | -1.89667900 | 0.13083400  | Sum of electronic and thermal Energies=      | -1353.954527                |
| C                     | -0.14754100 | -1.32370000 | 0.14423900  | Sum of electronic and thermal Enthalpies=    | -1353.953583                |
| C                     | -0.76699800 | -0.09495100 | 0.05783500  | Sum of electronic and thermal Free Energies= | -1354.040290                |
| N                     | 0.17908600  | 0.91595200  | -0.04694500 |                                              |                             |
| C                     | -0.78405900 | -2.65271400 | 0.20762100  |                                              |                             |
| C                     | -2.20849200 | 0.21023100  | 0.07520300  |                                              |                             |
| C                     | 4.95934300  | 0.67628500  | -0.10742600 |                                              |                             |
| C                     | 6.06841400  | -0.13700000 | -0.09309800 |                                              |                             |
| C                     | 5.93436500  | -1.53115200 | -0.00275900 |                                              |                             |
| C                     | 4.67881700  | -2.11432800 | 0.14231300  |                                              |                             |
| C                     | -2.77545000 | 1.02136600  | -0.90861300 |                                              |                             |
| C                     | -4.13855700 | 1.28956200  | -0.88842400 |                                              |                             |
| C                     | -4.93984900 | 0.76172700  | 0.11926800  |                                              |                             |
| C                     | -4.37578600 | -0.04116200 | 1.10701300  |                                              |                             |
| C                     | -3.01562400 | -0.31954600 | 1.08359100  |                                              |                             |
| C                     | -0.05240800 | 2.32399900  | 0.00256100  |                                              |                             |
| C                     | -0.82573200 | 2.86999800  | 1.02255300  |                                              |                             |
| C                     | -1.05045100 | 4.24070400  | 1.04847000  |                                              |                             |
| C                     | -0.49048800 | 5.06127300  | 0.07419400  |                                              |                             |
| C                     | 0.29715600  | 4.50786400  | -0.93010300 |                                              |                             |
| C                     | 0.51559600  | 3.13604900  | -0.97340600 |                                              |                             |
| O                     | -0.30960700 | -3.61111400 | 0.75540000  |                                              |                             |
| O                     | -1.96574600 | -2.66837600 | -0.42992500 |                                              |                             |
| C                     | -2.73036900 | -3.87662100 | -0.31878200 |                                              |                             |
| C                     | -4.04773100 | -3.62446000 | -1.01763700 |                                              |                             |
| H                     | 5.04203600  | 1.75431500  | -0.17549900 |                                              |                             |
| H                     | 7.05682600  | 0.30125200  | -0.15733200 |                                              |                             |
| H                     | 6.81406900  | -2.16182000 | 0.00896300  |                                              |                             |
| H                     | 4.54420200  | -3.18334800 | 0.04229700  |                                              |                             |
| H                     | -2.14945600 | 1.43534200  | -1.69103700 |                                              |                             |
| H                     | -4.57445700 | 1.91318000  | -1.65944000 |                                              |                             |
| H                     | -6.00143200 | 0.97790000  | 0.13683400  |                                              |                             |
| H                     | -4.99535500 | -0.44905600 | 1.89678100  |                                              |                             |
| H                     | -2.56965600 | -0.94445700 | 1.84972000  |                                              |                             |
| H                     | -1.24960200 | 2.22349000  | 1.78146800  |                                              |                             |
| H                     | -1.65730900 | 4.66747900  | 1.83761000  |                                              |                             |
| H                     | -0.66309900 | 6.13031000  | 0.10118300  |                                              |                             |
| H                     | 0.74095600  | 5.14374600  | -1.68638900 |                                              |                             |
| H                     | 1.12728900  | 2.69074800  | -1.74771100 |                                              |                             |
| H                     | -2.16798600 | -4.69510100 | -0.77282600 |                                              |                             |
| H                     | -2.86376000 | -4.11104400 | 0.74031100  |                                              |                             |
| H                     | -4.68630900 | -4.50624900 | -0.94139900 |                                              |                             |
| H                     | -4.56182700 | -2.77583800 | -0.56229900 |                                              |                             |
| H                     | -3.88463400 | -3.40274000 | -2.07319900 |                                              |                             |
| O                     | 4.70042200  | -2.33906500 | 2.19368000  |                                              |                             |
| H                     | 3.80142700  | -2.70491200 | 2.21531600  |                                              |                             |
| Name                  |             |             |             | TS-C6-OH-RAF-G                               |                             |

| Cartesian Coordinates |             |             |             | Energy                                       |                             |
|-----------------------|-------------|-------------|-------------|----------------------------------------------|-----------------------------|
| C                     | 1.25888700  | -1.11647000 | 0.11060600  | Zero-point correction=                       | 0.398558 (Hartree/Particle) |
| C                     | 1.43643600  | 0.30427100  | -0.01273800 | Thermal correction to Energy=                | 0.424766                    |
| N                     | 2.58464100  | 0.91668100  | -0.08577300 | Thermal correction to Enthalpy=              | 0.425710                    |
| C                     | 3.65049500  | 0.08292400  | -0.04529100 | Thermal correction to Gibbs Free Energy=     | 0.338857                    |
| C                     | 3.49675500  | -1.33657700 | 0.05944800  | Sum of electronic and zero-point Energies=   | -1353.979853                |
| N                     | 2.28134100  | -1.93558000 | 0.13221000  | Sum of electronic and thermal Energies=      | -1353.953645                |
| C                     | -0.16165800 | -1.34868500 | 0.15052800  | Sum of electronic and thermal Enthalpies=    | -1353.952701                |
| C                     | -0.77216600 | -0.11820000 | 0.07095600  | Sum of electronic and thermal Free Energies= | -1354.039554                |
| N                     | 0.18383700  | 0.88942300  | -0.02784500 |                                              |                             |
| C                     | -0.81124400 | -2.67278400 | 0.20360900  |                                              |                             |
| C                     | -2.21149800 | 0.19693700  | 0.08775400  |                                              |                             |
| C                     | 4.96464600  | 0.63981900  | -0.12671800 |                                              |                             |
| C                     | 6.05960200  | -0.16209500 | -0.09593100 |                                              |                             |
| C                     | 5.92603200  | -1.58549100 | 0.05959100  |                                              |                             |
| C                     | 4.65545000  | -2.15292900 | 0.06888700  |                                              |                             |
| C                     | -2.77263800 | 1.01566000  | -0.89312100 |                                              |                             |
| C                     | -4.13450700 | 1.29025500  | -0.87431900 |                                              |                             |
| C                     | -4.94059000 | 0.76063400  | 0.12862800  |                                              |                             |
| C                     | -4.38250800 | -0.05026700 | 1.11319000  |                                              |                             |
| C                     | -3.02344800 | -0.33434200 | 1.09152400  |                                              |                             |
| C                     | -0.04099500 | 2.29871000  | 0.02134600  |                                              |                             |
| C                     | -0.81462200 | 2.84710900  | 1.03985900  |                                              |                             |
| C                     | -1.03382200 | 4.21870900  | 1.06615400  |                                              |                             |
| C                     | -0.46854700 | 5.03752900  | 0.09346800  |                                              |                             |
| C                     | 0.31875500  | 4.48151600  | -0.90965600 |                                              |                             |
| C                     | 0.53190300  | 3.10886900  | -0.95334900 |                                              |                             |
| O                     | -0.35546600 | -3.63596000 | 0.75757900  |                                              |                             |
| O                     | -1.98345900 | -2.67434200 | -0.45165800 |                                              |                             |
| C                     | -2.76551200 | -3.87213700 | -0.34918400 |                                              |                             |
| C                     | -4.07067900 | -3.60260900 | -1.06427400 |                                              |                             |
| H                     | 5.04286200  | 1.71662500  | -0.21582100 |                                              |                             |
| H                     | 7.05445000  | 0.26201400  | -0.14554200 |                                              |                             |
| H                     | 6.78812800  | -2.21536600 | -0.10746800 |                                              |                             |
| H                     | 4.51892000  | -3.22508100 | 0.13152600  |                                              |                             |
| H                     | -2.14335000 | 1.43038600  | -1.67250700 |                                              |                             |
| H                     | -4.56583200 | 1.91983200  | -1.64306600 |                                              |                             |
| H                     | -6.00122700 | 0.98149800  | 0.14483300  |                                              |                             |
| H                     | -5.00578000 | -0.45995600 | 1.89909900  |                                              |                             |
| H                     | -2.58205600 | -0.96555300 | 1.85519800  |                                              |                             |
| H                     | -1.24363800 | 2.20172500  | 1.79685400  |                                              |                             |
| H                     | -1.64107000 | 4.64741500  | 1.85394000  |                                              |                             |
| H                     | -0.63712200 | 6.10720400  | 0.12053300  |                                              |                             |
| H                     | 0.76627600  | 5.11596800  | -1.66493800 |                                              |                             |
| H                     | 1.14308200  | 2.66167600  | -1.72693000 |                                              |                             |
| H                     | -2.20865700 | -4.69857500 | -0.79554900 |                                              |                             |
| H                     | -2.91513800 | -4.10360300 | 0.70842100  |                                              |                             |
| H                     | -4.72243800 | -4.47526600 | -0.99482200 |                                              |                             |
| H                     | -4.57821200 | -2.74627100 | -0.61597200 |                                              |                             |
| H                     | -3.89174400 | -3.38456800 | -2.11803500 |                                              |                             |
| O                     | 6.32651400  | -1.82663700 | 2.02708600  |                                              |                             |
| H                     | 5.53853600  | -1.40482100 | 2.40260900  |                                              |                             |
| <b>Name</b>           |             |             |             | <b>TS-C7-OH-RAF-G</b>                        |                             |
| Cartesian Coordinates |             |             |             | Energy                                       |                             |

|                       |             |             |             |                                              |                             |
|-----------------------|-------------|-------------|-------------|----------------------------------------------|-----------------------------|
| C                     | 1.27724500  | -1.11063900 | 0.10415500  | Zero-point correction=                       | 0.398516 (Hartree/Particle) |
| C                     | 1.45448700  | 0.30973200  | -0.02730500 | Thermal correction to Energy=                | 0.424768                    |
| N                     | 2.59825200  | 0.92060300  | -0.10364100 | Thermal correction to Enthalpy=              | 0.425712                    |
| C                     | 3.66863800  | 0.08091300  | -0.06151600 | Thermal correction to Gibbs Free Energy=     | 0.338781                    |
| C                     | 3.51228000  | -1.33943300 | 0.03601500  | Sum of electronic and zero-point Energies=   | -1353.980371                |
| N                     | 2.30305600  | -1.93282000 | 0.11884200  | Sum of electronic and thermal Energies=      | -1353.954119                |
| C                     | -0.13866500 | -1.34355000 | 0.15327000  | Sum of electronic and thermal Enthalpies=    | -1353.953175                |
| C                     | -0.75276800 | -0.11158700 | 0.07018000  | Sum of electronic and thermal Free Energies= | -1354.040106                |
| N                     | 0.19747300  | 0.89487200  | -0.03974800 |                                              |                             |
| C                     | -0.78781200 | -2.66763500 | 0.21399100  |                                              |                             |
| C                     | -2.19298900 | 0.19752400  | 0.09407000  |                                              |                             |
| C                     | 4.96953500  | 0.62863700  | -0.14750100 |                                              |                             |
| C                     | 6.09138200  | -0.19144600 | -0.06679700 |                                              |                             |
| C                     | 5.92109400  | -1.61830900 | -0.02545200 |                                              |                             |
| C                     | 4.68129100  | -2.16624200 | 0.04334700  |                                              |                             |
| C                     | -2.76120300 | 1.01837000  | -0.88104700 |                                              |                             |
| C                     | -4.12411500 | 1.28695500  | -0.85592400 |                                              |                             |
| C                     | -4.92407400 | 0.74973100  | 0.14788700  |                                              |                             |
| C                     | -4.35888100 | -0.06299100 | 1.12692500  |                                              |                             |
| C                     | -2.99888200 | -0.34164600 | 1.09864700  |                                              |                             |
| C                     | -0.02608900 | 2.30415300  | 0.01513600  |                                              |                             |
| C                     | -0.79264900 | 2.85069400  | 1.03996800  |                                              |                             |
| C                     | -1.00927100 | 4.22256600  | 1.07182800  |                                              |                             |
| C                     | -0.44794200 | 5.04349600  | 0.09863000  |                                              |                             |
| C                     | 0.33271100  | 4.48932400  | -0.91064800 |                                              |                             |
| C                     | 0.54289000  | 3.11641500  | -0.96005300 |                                              |                             |
| O                     | -0.33493700 | -3.62637300 | 0.77813100  |                                              |                             |
| O                     | -1.95653700 | -2.67466300 | -0.44739800 |                                              |                             |
| C                     | -2.74075900 | -3.87030900 | -0.33713600 |                                              |                             |
| C                     | -4.04377200 | -3.60445100 | -1.05752200 |                                              |                             |
| H                     | 5.06782800  | 1.70349500  | -0.23090500 |                                              |                             |
| H                     | 7.06462500  | 0.21543300  | -0.30146800 |                                              |                             |
| H                     | 6.80338300  | -2.24544400 | -0.00898800 |                                              |                             |
| H                     | 4.52520300  | -3.23650100 | 0.10337900  |                                              |                             |
| H                     | -2.13654800 | 1.43919900  | -1.66085400 |                                              |                             |
| H                     | -4.56102200 | 1.91806300  | -1.62023700 |                                              |                             |
| H                     | -5.98551600 | 0.96623000  | 0.16920100  |                                              |                             |
| H                     | -4.97737800 | -0.47826000 | 1.91366500  |                                              |                             |
| H                     | -2.55208400 | -0.97399300 | 1.85826400  |                                              |                             |
| H                     | -1.21784600 | 2.20380600  | 1.79784700  |                                              |                             |
| H                     | -1.61074500 | 4.64993800  | 1.86475100  |                                              |                             |
| H                     | -0.61388500 | 6.11344300  | 0.13045000  |                                              |                             |
| H                     | 0.77775800  | 5.12546900  | -1.66594800 |                                              |                             |
| H                     | 1.14923700  | 2.67067700  | -1.73825400 |                                              |                             |
| H                     | -2.18414700 | -4.70125200 | -0.77537200 |                                              |                             |
| H                     | -2.89339800 | -4.09277600 | 0.72199400  |                                              |                             |
| H                     | -4.69707900 | -4.47551200 | -0.98278500 |                                              |                             |
| H                     | -4.55097100 | -2.74383500 | -0.61707600 |                                              |                             |
| H                     | -3.86198700 | -3.39495900 | -2.11252100 |                                              |                             |
| O                     | 6.54631400  | 0.25162900  | 1.86382100  |                                              |                             |
| H                     | 5.73831800  | -0.07959600 | 2.28499200  |                                              |                             |
| <b>Name</b>           |             |             |             | <b>TS-C8-OH-RAF-G</b>                        |                             |
| Cartesian Coordinates |             |             |             | Energy                                       |                             |
| C                     | 1.28284000  | -1.07339600 | 0.11702500  | Zero-point correction=                       | 0.398555 (Hartree/Particle) |

|                       |             |             |             |                                              |                             |
|-----------------------|-------------|-------------|-------------|----------------------------------------------|-----------------------------|
| C                     | 1.44659300  | 0.34783000  | -0.01295500 | Thermal correction to Energy=                | 0.424761                    |
| N                     | 2.58798000  | 0.97092900  | -0.08045600 | Thermal correction to Enthalpy=              | 0.425705                    |
| C                     | 3.65757300  | 0.14614100  | -0.02965000 | Thermal correction to Gibbs Free Energy=     | 0.338836                    |
| C                     | 3.52041700  | -1.27054400 | 0.05659000  | Sum of electronic and zero-point Energies=   | -1353.981598                |
| N                     | 2.31464200  | -1.88282000 | 0.13232300  | Sum of electronic and thermal Energies=      | -1353.955392                |
| C                     | -0.13448100 | -1.31979700 | 0.15827600  | Sum of electronic and thermal Enthalpies=    | -1353.954448                |
| C                     | -0.75717100 | -0.09464000 | 0.06947900  | Sum of electronic and thermal Free Energies= | -1354.041317                |
| N                     | 0.18713400  | 0.92051800  | -0.03616100 |                                              |                             |
| C                     | -0.76889900 | -2.65026200 | 0.21468100  |                                              |                             |
| C                     | -2.19959900 | 0.20733800  | 0.08409000  |                                              |                             |
| C                     | 4.97092600  | 0.72275400  | -0.04726500 |                                              |                             |
| C                     | 6.08082600  | -0.11190600 | -0.14158400 |                                              |                             |
| C                     | 5.93721600  | -1.51331300 | -0.06538600 |                                              |                             |
| C                     | 4.69315900  | -2.08095900 | 0.04107900  |                                              |                             |
| C                     | -2.76818400 | 1.01000300  | -0.90557100 |                                              |                             |
| C                     | -4.13210100 | 1.27443800  | -0.88811800 |                                              |                             |
| C                     | -4.93261500 | 0.75108300  | 0.12251400  |                                              |                             |
| C                     | -4.36688600 | -0.04341600 | 1.11607800  |                                              |                             |
| C                     | -3.00582900 | -0.31774700 | 1.09554300  |                                              |                             |
| C                     | -0.05107300 | 2.32815900  | 0.00491700  |                                              |                             |
| C                     | -0.82907600 | 2.87563100  | 1.02033000  |                                              |                             |
| C                     | -1.06021000 | 4.24530100  | 1.03828100  |                                              |                             |
| C                     | -0.50219000 | 5.06309400  | 0.06059800  |                                              |                             |
| C                     | 0.29010200  | 4.50810400  | -0.93902700 |                                              |                             |
| C                     | 0.51501800  | 3.13717400  | -0.97440600 |                                              |                             |
| O                     | -0.29450600 | -3.61211100 | 0.75583600  |                                              |                             |
| O                     | -1.95123000 | -2.66229800 | -0.42290600 |                                              |                             |
| C                     | -2.71647800 | -3.87021800 | -0.31747500 |                                              |                             |
| C                     | -4.03453800 | -3.61283100 | -1.01327800 |                                              |                             |
| H                     | 5.04494700  | 1.78446600  | -0.23652200 |                                              |                             |
| H                     | 7.06632900  | 0.32931300  | -0.22012600 |                                              |                             |
| H                     | 6.81857400  | -2.14203900 | -0.09674400 |                                              |                             |
| H                     | 4.55336500  | -3.15339600 | 0.10405600  |                                              |                             |
| H                     | -2.14276000 | 1.42086300  | -1.69009500 |                                              |                             |
| H                     | -4.56917800 | 1.89182300  | -1.66348200 |                                              |                             |
| H                     | -5.99482600 | 0.96435100  | 0.13790500  |                                              |                             |
| H                     | -4.98582300 | -0.44776800 | 1.90817500  |                                              |                             |
| H                     | -2.55830700 | -0.93620500 | 1.86599400  |                                              |                             |
| H                     | -1.25047400 | 2.23138700  | 1.78248600  |                                              |                             |
| H                     | -1.66980100 | 4.67368300  | 1.82441600  |                                              |                             |
| H                     | -0.67900800 | 6.13156000  | 0.08202700  |                                              |                             |
| H                     | 0.73353400  | 5.14209300  | -1.69707200 |                                              |                             |
| H                     | 1.13141500  | 2.69079300  | -1.74429200 |                                              |                             |
| H                     | -2.15561100 | -4.68688100 | -0.77673600 |                                              |                             |
| H                     | -2.84891100 | -4.11052300 | 0.74044700  |                                              |                             |
| H                     | -4.67442000 | -4.49400100 | -0.94062500 |                                              |                             |
| H                     | -4.54659400 | -2.76558800 | -0.55305500 |                                              |                             |
| H                     | -3.87251300 | -3.38598100 | -2.06793000 |                                              |                             |
| O                     | 5.25469800  | 1.17651600  | 1.94550100  |                                              |                             |
| H                     | 5.38101500  | 0.27917800  | 2.29075300  |                                              |                             |
| <b>Name</b>           |             |             |             | <b>TS-C9-OH-RAF-G</b>                        |                             |
| Cartesian Coordinates |             |             |             | Energy                                       |                             |
| C                     | 1.26057300  | -1.06970400 | 0.20999600  | Zero-point correction=                       | 0.398334 (Hartree/Particle) |
| C                     | 1.43689400  | 0.35615500  | 0.04564500  | Thermal correction to Energy=                | 0.424424                    |

|                       |             |             |             |                                              |                             |
|-----------------------|-------------|-------------|-------------|----------------------------------------------|-----------------------------|
| N                     | 2.56774900  | 0.97254800  | -0.04105200 | Thermal correction to Enthalpy=              | 0.425368                    |
| C                     | 3.65012400  | 0.13360600  | 0.15100200  | Thermal correction to Gibbs Free Energy=     | 0.339411                    |
| C                     | 3.48645000  | -1.31706900 | 0.12604500  | Sum of electronic and zero-point Energies=   | -1353.972014                |
| N                     | 2.27994800  | -1.90189600 | 0.19815000  | Sum of electronic and thermal Energies=      | -1353.945924                |
| C                     | -0.15117400 | -1.30581000 | 0.23602300  | Sum of electronic and thermal Enthalpies=    | -1353.944980                |
| C                     | -0.77195800 | -0.07959000 | 0.10340100  | Sum of electronic and thermal Free Energies= | -1354.030937                |
| N                     | 0.17234900  | 0.92967500  | -0.02289400 |                                              |                             |
| C                     | -0.79647300 | -2.63200800 | 0.30691900  |                                              |                             |
| C                     | -2.21397500 | 0.21454700  | 0.08997900  |                                              |                             |
| C                     | 4.95785500  | 0.67336700  | -0.13832600 |                                              |                             |
| C                     | 6.03411700  | -0.14729800 | -0.23432700 |                                              |                             |
| C                     | 5.88021300  | -1.55992500 | -0.10204600 |                                              |                             |
| C                     | 4.64828800  | -2.12582300 | 0.06962800  |                                              |                             |
| C                     | -2.76807900 | 1.02320500  | -0.90376200 |                                              |                             |
| C                     | -4.13448400 | 1.27368100  | -0.91454900 |                                              |                             |
| C                     | -4.95242400 | 0.73174800  | 0.07218700  |                                              |                             |
| C                     | -4.40164600 | -0.06790300 | 1.07015000  |                                              |                             |
| C                     | -3.03817200 | -0.32954900 | 1.07748400  |                                              |                             |
| C                     | -0.05916700 | 2.33749100  | 0.01426600  |                                              |                             |
| C                     | -0.84701600 | 2.89225000  | 1.01868400  |                                              |                             |
| C                     | -1.06962000 | 4.26350800  | 1.03176200  |                                              |                             |
| C                     | -0.49318900 | 5.07665600  | 0.06072900  |                                              |                             |
| C                     | 0.30949000  | 4.51502500  | -0.92695300 |                                              |                             |
| C                     | 0.52601100  | 3.14245100  | -0.95765500 |                                              |                             |
| O                     | -0.36895000 | -3.57096000 | 0.92068200  |                                              |                             |
| O                     | -1.93211700 | -2.66448400 | -0.41064800 |                                              |                             |
| C                     | -2.71816100 | -3.85839000 | -0.29820700 |                                              |                             |
| C                     | -3.98795000 | -3.61984900 | -1.08452600 |                                              |                             |
| H                     | 5.03311300  | 1.74940400  | -0.24328700 |                                              |                             |
| H                     | 7.01825100  | 0.26449700  | -0.42112500 |                                              |                             |
| H                     | 6.75802300  | -2.19250700 | -0.16072100 |                                              |                             |
| H                     | 4.51104000  | -3.19767700 | 0.14029600  |                                              |                             |
| H                     | -2.12968100 | 1.44724100  | -1.67050900 |                                              |                             |
| H                     | -4.56021400 | 1.89440200  | -1.69354200 |                                              |                             |
| H                     | -6.01679700 | 0.93442400  | 0.06547300  |                                              |                             |
| H                     | -5.03425300 | -0.48625600 | 1.84390400  |                                              |                             |
| H                     | -2.60248700 | -0.95076800 | 1.85263200  |                                              |                             |
| H                     | -1.28322300 | 2.25192700  | 1.77589600  |                                              |                             |
| H                     | -1.68801600 | 4.69665400  | 1.80841700  |                                              |                             |
| H                     | -0.66459600 | 6.14611400  | 0.07760100  |                                              |                             |
| H                     | 0.76620100  | 5.14496800  | -1.68057100 |                                              |                             |
| H                     | 1.14940100  | 2.69037400  | -1.71849100 |                                              |                             |
| H                     | -2.14080100 | -4.70107100 | -0.68411700 |                                              |                             |
| H                     | -2.91821300 | -4.04785700 | 0.75951700  |                                              |                             |
| H                     | -4.64209900 | -4.49050600 | -1.01218100 |                                              |                             |
| H                     | -4.51640900 | -2.74786000 | -0.69420100 |                                              |                             |
| H                     | -3.75933100 | -3.44242200 | -2.13630500 |                                              |                             |
| O                     | 3.74274100  | 0.18915700  | 2.07402100  |                                              |                             |
| H                     | 3.70974500  | 1.15289800  | 2.17354000  |                                              |                             |
| <b>Name</b>           |             |             |             | <b>TS-C11-OH-RAF-G</b>                       |                             |
| Cartesian Coordinates |             |             |             | Energy                                       |                             |
| C                     | 1.26063300  | -1.08519800 | 0.21733700  | Zero-point correction=                       | 0.398425 (Hartree/Particle) |
| C                     | 1.43562800  | 0.35996000  | 0.11179400  | Thermal correction to Energy=                | 0.424403                    |
| N                     | 2.58944200  | 0.94531800  | -0.18866500 | Thermal correction to Enthalpy=              | 0.425348                    |

|                       |             |             |             |                                              |                             |
|-----------------------|-------------|-------------|-------------|----------------------------------------------|-----------------------------|
| C                     | 3.64586000  | 0.11406100  | -0.10175700 | Thermal correction to Gibbs Free Energy=     | 0.339786                    |
| C                     | 3.49244200  | -1.30049600 | 0.12033400  | Sum of electronic and zero-point Energies=   | -1353.977163                |
| N                     | 2.27867400  | -1.90029600 | 0.22666100  | Sum of electronic and thermal Energies=      | -1353.951184                |
| C                     | -0.15133200 | -1.31660800 | 0.21822400  | Sum of electronic and thermal Enthalpies=    | -1353.950240                |
| C                     | -0.76299500 | -0.09108900 | 0.03257300  | Sum of electronic and thermal Free Energies= | -1354.035802                |
| N                     | 0.17267600  | 0.91276700  | -0.12753800 |                                              |                             |
| C                     | -0.79329100 | -2.64181500 | 0.30425000  |                                              |                             |
| C                     | -2.20225600 | 0.21697400  | -0.00101700 |                                              |                             |
| C                     | 4.95434300  | 0.64876600  | -0.28131300 |                                              |                             |
| C                     | 6.04784100  | -0.16499600 | -0.22041900 |                                              |                             |
| C                     | 5.89574400  | -1.55978900 | 0.00921400  |                                              |                             |
| C                     | 4.65422000  | -2.11180400 | 0.16637400  |                                              |                             |
| C                     | -2.73460500 | 1.00593300  | -1.02139200 |                                              |                             |
| C                     | -4.09577400 | 1.28329000  | -1.04652700 |                                              |                             |
| C                     | -4.92727100 | 0.79051300  | -0.04572100 |                                              |                             |
| C                     | -4.39616800 | 0.01359100  | 0.98070300  |                                              |                             |
| C                     | -3.03895300 | -0.27730500 | 1.00134600  |                                              |                             |
| C                     | -0.06756000 | 2.31555400  | 0.00363100  |                                              |                             |
| C                     | -0.75751600 | 2.80501800  | 1.10882200  |                                              |                             |
| C                     | -0.98434700 | 4.17131400  | 1.21697400  |                                              |                             |
| C                     | -0.50531500 | 5.04034500  | 0.24041800  |                                              |                             |
| C                     | 0.20451600  | 4.54271500  | -0.84751000 |                                              |                             |
| C                     | 0.42366300  | 3.17513300  | -0.97192300 |                                              |                             |
| O                     | -0.34200500 | -3.58510900 | 0.89430200  |                                              |                             |
| O                     | -1.95442400 | -2.67350300 | -0.37284100 |                                              |                             |
| C                     | -2.72475400 | -3.87632000 | -0.25147800 |                                              |                             |
| C                     | -4.01719600 | -3.64419000 | -1.00217600 |                                              |                             |
| H                     | 5.03800400  | 1.71509900  | -0.45364800 |                                              |                             |
| H                     | 7.04086700  | 0.24864800  | -0.34783900 |                                              |                             |
| H                     | 6.77634000  | -2.18939300 | 0.05334900  |                                              |                             |
| H                     | 4.51170800  | -3.17248600 | 0.33265000  |                                              |                             |
| H                     | -2.08349400 | 1.39231000  | -1.79722000 |                                              |                             |
| H                     | -4.50624900 | 1.88757700  | -1.84634300 |                                              |                             |
| H                     | -5.98720800 | 1.01486400  | -0.06279500 |                                              |                             |
| H                     | -5.03971900 | -0.36429400 | 1.76618300  |                                              |                             |
| H                     | -2.61665300 | -0.87956500 | 1.79828100  |                                              |                             |
| H                     | -1.10116500 | 2.11428400  | 1.86926400  |                                              |                             |
| H                     | -1.52778600 | 4.55812400  | 2.07043700  |                                              |                             |
| H                     | -0.68092800 | 6.10558500  | 0.33083700  |                                              |                             |
| H                     | 0.58543400  | 5.21790100  | -1.60406800 |                                              |                             |
| H                     | 0.97475800  | 2.76664300  | -1.80986400 |                                              |                             |
| H                     | -2.14936000 | -4.70919400 | -0.66103100 |                                              |                             |
| H                     | -2.89500400 | -4.07872700 | 0.80897300  |                                              |                             |
| H                     | -4.65945600 | -4.52302000 | -0.92215200 |                                              |                             |
| H                     | -4.54535100 | -2.78234600 | -0.58978900 |                                              |                             |
| H                     | -3.81776500 | -3.45338200 | -2.05757300 |                                              |                             |
| O                     | 1.48397500  | 0.60778800  | 2.05799100  |                                              |                             |
| H                     | 2.03637600  | 1.40505200  | 2.08589000  |                                              |                             |
| <b>Name</b>           |             |             |             | <b>TS-C12-OH-RAF-G</b>                       |                             |
| Cartesian Coordinates |             |             |             | Energy                                       |                             |
| C                     | 1.25304200  | -1.03772200 | 0.28582700  | Zero-point correction=                       | 0.399336 (Hartree/Particle) |
| C                     | 1.42106700  | 0.35886800  | 0.00290400  | Thermal correction to Energy=                | 0.425136                    |
| N                     | 2.55236600  | 0.95647400  | -0.17981800 | Thermal correction to Enthalpy=              | 0.426080                    |
| C                     | 3.63075100  | 0.12072400  | -0.09808100 | Thermal correction to Gibbs Free Energy=     | 0.341050                    |



|                       |             |             |             |                                              |                             |
|-----------------------|-------------|-------------|-------------|----------------------------------------------|-----------------------------|
| C                     | 3.48204900  | -1.27702700 | 0.15242900  | Sum of electronic and zero-point Energies=   | -1353.989730                |
| N                     | 2.26332400  | -1.85591300 | 0.34984100  | Sum of electronic and thermal Energies=      | -1353.963930                |
| C                     | -0.17248800 | -1.25538600 | 0.47103800  | Sum of electronic and thermal Enthalpies=    | -1353.962986                |
| C                     | -0.79333600 | -0.02708600 | 0.18580000  | Sum of electronic and thermal Free Energies= | -1354.048016                |
| N                     | 0.15330400  | 0.94295100  | -0.03566200 |                                              |                             |
| C                     | -0.80690400 | -2.59885600 | 0.38815700  |                                              |                             |
| C                     | -2.22965900 | 0.25846000  | 0.19268300  |                                              |                             |
| C                     | 4.92818200  | 0.65703800  | -0.28002600 |                                              |                             |
| C                     | 6.02631300  | -0.15863800 | -0.21785900 |                                              |                             |
| C                     | 5.88094200  | -1.54644000 | 0.02674200  |                                              |                             |
| C                     | 4.63940100  | -2.09328300 | 0.20775400  |                                              |                             |
| C                     | -2.81018400 | 1.05360600  | -0.79941300 |                                              |                             |
| C                     | -4.18020000 | 1.27776900  | -0.79312700 |                                              |                             |
| C                     | -4.97352400 | 0.72476500  | 0.20865700  |                                              |                             |
| C                     | -4.39437800 | -0.05699400 | 1.20477200  |                                              |                             |
| C                     | -3.02652400 | -0.29690500 | 1.19912000  |                                              |                             |
| C                     | -0.06030300 | 2.35588100  | -0.04693900 |                                              |                             |
| C                     | -0.76192200 | 2.94950400  | 0.99747500  |                                              |                             |
| C                     | -0.97426400 | 4.32187900  | 0.97556100  |                                              |                             |
| C                     | -0.47420900 | 5.09163700  | -0.07095200 |                                              |                             |
| C                     | 0.24366800  | 4.48812600  | -1.09848100 |                                              |                             |
| C                     | 0.45213600  | 3.11378100  | -1.09328800 |                                              |                             |
| O                     | -0.39652500 | -3.57289000 | 0.95807400  |                                              |                             |
| O                     | -1.87575800 | -2.59290300 | -0.41480300 |                                              |                             |
| C                     | -2.64421100 | -3.80549900 | -0.45820200 |                                              |                             |
| C                     | -3.87188600 | -3.51215500 | -1.29056200 |                                              |                             |
| H                     | 5.01198000  | 1.72107300  | -0.46513900 |                                              |                             |
| H                     | 7.01695500  | 0.25748100  | -0.35642300 |                                              |                             |
| H                     | 6.76188400  | -2.17517500 | 0.07243000  |                                              |                             |
| H                     | 4.49640700  | -3.14966500 | 0.40010300  |                                              |                             |
| H                     | -2.19148700 | 1.48219600  | -1.57965500 |                                              |                             |
| H                     | -4.62899000 | 1.88501400  | -1.56981800 |                                              |                             |
| H                     | -6.04168200 | 0.90743400  | 0.21490400  |                                              |                             |
| H                     | -5.00942800 | -0.47730500 | 1.99158300  |                                              |                             |
| H                     | -2.55058000 | -0.88527200 | 1.97635100  |                                              |                             |
| H                     | -1.13081000 | 2.33517300  | 1.81077600  |                                              |                             |
| H                     | -1.52322700 | 4.79068300  | 1.78296600  |                                              |                             |
| H                     | -0.63805100 | 6.16240100  | -0.08150300 |                                              |                             |
| H                     | 0.64132500  | 5.08643900  | -1.90909900 |                                              |                             |
| H                     | 1.01096800  | 2.62730000  | -1.88272000 |                                              |                             |
| H                     | -2.02745700 | -4.59833000 | -0.88634300 |                                              |                             |
| H                     | -2.89759100 | -4.09175500 | 0.56511600  |                                              |                             |
| H                     | -4.51260500 | -4.39455600 | -1.33405200 |                                              |                             |
| H                     | -4.43667800 | -2.68720900 | -0.85215800 |                                              |                             |
| H                     | -3.58950000 | -3.23652000 | -2.30754200 |                                              |                             |
| O                     | -0.24041500 | -1.07771600 | 2.50565300  |                                              |                             |
| H                     | 0.21636900  | -1.92228600 | 2.64587500  |                                              |                             |
| <b>Name</b>           |             |             |             | <b>TS-C12-OH-RAF-P</b>                       |                             |
| Cartesian Coordinates |             |             |             | Energy                                       |                             |
| C                     | 1.23796200  | -1.03737800 | 0.30704400  | Zero-point correction=                       | 0.399028 (Hartree/Particle) |
| C                     | 1.40911000  | 0.36053000  | 0.03033600  | Thermal correction to Energy=                | 0.424823                    |
| N                     | 2.54334900  | 0.95364000  | -0.14744000 | Thermal correction to Enthalpy=              | 0.425767                    |
| C                     | 3.62209100  | 0.11659500  | -0.07350500 | Thermal correction to Gibbs Free Energy=     | 0.340877                    |
| C                     | 3.47078700  | -1.28254500 | 0.16876900  | Sum of electronic and zero-point Energies=   | -1354.023273                |

|                       |             |             |             |                                              |                             |
|-----------------------|-------------|-------------|-------------|----------------------------------------------|-----------------------------|
| N                     | 2.24853100  | -1.85669100 | 0.36595500  | Sum of electronic and thermal Energies=      | -1353.997478                |
| C                     | -0.18640900 | -1.25071200 | 0.49714400  | Sum of electronic and thermal Enthalpies=    | -1353.996534                |
| C                     | -0.80429100 | -0.01440000 | 0.22217300  | Sum of electronic and thermal Free Energies= | -1354.081424                |
| N                     | 0.14524800  | 0.94850300  | 0.00004200  |                                              |                             |
| C                     | -0.82018700 | -2.59336100 | 0.39773600  |                                              |                             |
| C                     | -2.23913900 | 0.27560500  | 0.23726300  |                                              |                             |
| C                     | 4.91994500  | 0.65248300  | -0.25328700 |                                              |                             |
| C                     | 6.01705300  | -0.16637100 | -0.19718400 |                                              |                             |
| C                     | 5.86908000  | -1.55538100 | 0.03878500  |                                              |                             |
| C                     | 4.62615000  | -2.10181200 | 0.21793300  |                                              |                             |
| C                     | -2.81973500 | 1.10365700  | -0.72943100 |                                              |                             |
| C                     | -4.18936000 | 1.33217500  | -0.71128600 |                                              |                             |
| C                     | -4.98251600 | 0.75175600  | 0.27578000  |                                              |                             |
| C                     | -4.40490900 | -0.06672600 | 1.24350900  |                                              |                             |
| C                     | -3.03813800 | -0.31246200 | 1.22423600  |                                              |                             |
| C                     | -0.06128700 | 2.36514800  | -0.04590500 |                                              |                             |
| C                     | -0.69433100 | 2.99637900  | 1.01949300  |                                              |                             |
| C                     | -0.90310500 | 4.36928200  | 0.96288600  |                                              |                             |
| C                     | -0.46805300 | 5.09863600  | -0.14060000 |                                              |                             |
| C                     | 0.17932600  | 4.45561700  | -1.19189700 |                                              |                             |
| C                     | 0.38352200  | 3.08062700  | -1.15147300 |                                              |                             |
| O                     | -0.40842100 | -3.56935700 | 0.97137000  |                                              |                             |
| O                     | -1.86717000 | -2.59338600 | -0.42401600 |                                              |                             |
| C                     | -2.62618600 | -3.81711700 | -0.50259400 |                                              |                             |
| C                     | -3.81200600 | -3.54433300 | -1.39592800 |                                              |                             |
| H                     | 5.00978000  | 1.71763400  | -0.43320700 |                                              |                             |
| H                     | 7.00879800  | 0.24845000  | -0.33412500 |                                              |                             |
| H                     | 6.74925300  | -2.18618000 | 0.07920400  |                                              |                             |
| H                     | 4.48724300  | -3.16062600 | 0.40386300  |                                              |                             |
| H                     | -2.20582900 | 1.55079500  | -1.50294600 |                                              |                             |
| H                     | -4.63789400 | 1.96429100  | -1.46852100 |                                              |                             |
| H                     | -6.05007300 | 0.93924500  | 0.29111400  |                                              |                             |
| H                     | -5.01979800 | -0.51292100 | 2.01639300  |                                              |                             |
| H                     | -2.56992600 | -0.93446800 | 1.97931700  |                                              |                             |
| H                     | -1.01699700 | 2.41421100  | 1.87534700  |                                              |                             |
| H                     | -1.39956000 | 4.86892700  | 1.78612300  |                                              |                             |
| H                     | -0.62996800 | 6.16949400  | -0.17882800 |                                              |                             |
| H                     | 0.52240600  | 5.02230300  | -2.04929700 |                                              |                             |
| H                     | 0.87683500  | 2.56391800  | -1.96597000 |                                              |                             |
| H                     | -1.98248100 | -4.60393900 | -0.90042300 |                                              |                             |
| H                     | -2.93135400 | -4.09872600 | 0.50767300  |                                              |                             |
| H                     | -4.42874400 | -4.44246500 | -1.46732200 |                                              |                             |
| H                     | -4.42115000 | -2.73431900 | -0.98921100 |                                              |                             |
| H                     | -3.48569900 | -3.26800900 | -2.40026000 |                                              |                             |
| O                     | -0.22642400 | -1.10961000 | 2.55112500  |                                              |                             |
| H                     | 0.22232400  | -1.96343400 | 2.65496800  |                                              |                             |
| <b>Name</b>           |             |             |             | <b>TS-C13-OH-RAF-G</b>                       |                             |
| Cartesian Coordinates |             |             |             | Energy                                       |                             |
| C                     | 1.27109400  | -1.06420100 | 0.10735900  | Zero-point correction=                       | 0.398778 (Hartree/Particle) |
| C                     | 1.42840600  | 0.36036200  | -0.02901100 | Thermal correction to Energy=                | 0.424724                    |
| N                     | 2.56008100  | 0.97672600  | -0.15722000 | Thermal correction to Enthalpy=              | 0.425668                    |
| C                     | 3.64143300  | 0.14378400  | -0.17524000 | Thermal correction to Gibbs Free Energy=     | 0.339050                    |
| C                     | 3.50348600  | -1.27591700 | -0.06816700 | Sum of electronic and zero-point Energies=   | -1353.987608                |
| N                     | 2.29667300  | -1.88012400 | 0.07745800  | Sum of electronic and thermal Energies=      | -1353.961661                |

|                       |             |             |             |                                              |                             |
|-----------------------|-------------|-------------|-------------|----------------------------------------------|-----------------------------|
| C                     | -0.13605500 | -1.31107500 | 0.23388200  | Sum of electronic and thermal Enthalpies=    | -1353.960717                |
| C                     | -0.77565300 | -0.04951800 | 0.22794600  | Sum of electronic and thermal Free Energies= | -1354.047335                |
| N                     | 0.16514400  | 0.93917700  | 0.00937800  |                                              |                             |
| C                     | -0.76240500 | -2.64206200 | 0.36876600  |                                              |                             |
| C                     | -2.21178300 | 0.25971700  | 0.01464400  |                                              |                             |
| C                     | 4.93479600  | 0.70325800  | -0.31066300 |                                              |                             |
| C                     | 6.03726700  | -0.10815700 | -0.34203000 |                                              |                             |
| C                     | 5.90380100  | -1.51627000 | -0.24030200 |                                              |                             |
| C                     | 4.66858900  | -2.08688900 | -0.10627700 |                                              |                             |
| C                     | -2.55173800 | 0.96066200  | -1.14436600 |                                              |                             |
| C                     | -3.88289200 | 1.23994800  | -1.42791900 |                                              |                             |
| C                     | -4.88058700 | 0.83125700  | -0.55021100 |                                              |                             |
| C                     | -4.54131200 | 0.13768800  | 0.60797600  |                                              |                             |
| C                     | -3.21345900 | -0.15449900 | 0.89199900  |                                              |                             |
| C                     | -0.06282500 | 2.34283300  | 0.15690200  |                                              |                             |
| C                     | -0.82659300 | 2.80586300  | 1.22382300  |                                              |                             |
| C                     | -1.05720100 | 4.17099900  | 1.34420000  |                                              |                             |
| C                     | -0.51590400 | 5.06066200  | 0.42134000  |                                              |                             |
| C                     | 0.26085600  | 4.58414300  | -0.63019700 |                                              |                             |
| C                     | 0.48746600  | 3.22029000  | -0.77095600 |                                              |                             |
| O                     | -0.22171100 | -3.58386500 | 0.88130500  |                                              |                             |
| O                     | -1.99323600 | -2.67113800 | -0.15315900 |                                              |                             |
| C                     | -2.71822800 | -3.90038800 | 0.00934700  |                                              |                             |
| C                     | -4.07624600 | -3.69555500 | -0.62283900 |                                              |                             |
| H                     | 5.01188400  | 1.78112600  | -0.38553200 |                                              |                             |
| H                     | 7.02420400  | 0.32680000  | -0.44504700 |                                              |                             |
| H                     | 6.78955900  | -2.13916100 | -0.26710200 |                                              |                             |
| H                     | 4.53194900  | -3.15816000 | -0.02213100 |                                              |                             |
| H                     | -1.77343100 | 1.28370800  | -1.82641700 |                                              |                             |
| H                     | -4.13717800 | 1.78084400  | -2.33129200 |                                              |                             |
| H                     | -5.91859900 | 1.05604500  | -0.76532900 |                                              |                             |
| H                     | -5.31564900 | -0.17587300 | 1.29835300  |                                              |                             |
| H                     | -2.93877800 | -0.68598700 | 1.79238700  |                                              |                             |
| H                     | -1.21952600 | 2.09523100  | 1.94122200  |                                              |                             |
| H                     | -1.65559300 | 4.53959500  | 2.16847700  |                                              |                             |
| H                     | -0.69571500 | 6.12410200  | 0.52321300  |                                              |                             |
| H                     | 0.68842300  | 5.27396400  | -1.34763900 |                                              |                             |
| H                     | 1.08922400  | 2.83366100  | -1.58359900 |                                              |                             |
| H                     | -2.15504600 | -4.70593000 | -0.46623900 |                                              |                             |
| H                     | -2.78723300 | -4.12408700 | 1.07641900  |                                              |                             |
| H                     | -4.67828500 | -4.59898900 | -0.51100300 |                                              |                             |
| H                     | -4.59666700 | -2.86321800 | -0.14657400 |                                              |                             |
| H                     | -3.97409700 | -3.47390600 | -1.68608100 |                                              |                             |
| O                     | -0.79105500 | -0.28304800 | 2.31548400  |                                              |                             |
| H                     | 0.05507400  | -0.68625800 | 2.56238300  |                                              |                             |
| <b>Name</b>           |             |             |             | <b>TS-C13-OH-RAF-P</b>                       |                             |
| Cartesian Coordinates |             |             |             | Energy                                       |                             |
| C                     | 1.29695000  | -1.09096600 | 0.02315100  | Zero-point correction=                       | 0.398562 (Hartree/Particle) |
| C                     | 1.44217700  | 0.34056100  | -0.03131100 | Thermal correction to Energy=                | 0.424311                    |
| N                     | 2.56822100  | 0.97653000  | -0.08710100 | Thermal correction to Enthalpy=              | 0.425255                    |
| C                     | 3.66492200  | 0.16343400  | -0.11742200 | Thermal correction to Gibbs Free Energy=     | 0.341285                    |
| C                     | 3.54398500  | -1.26061700 | -0.08287500 | Sum of electronic and zero-point Energies=   | -1354.019809                |
| N                     | 2.33947800  | -1.88519300 | -0.00391200 | Sum of electronic and thermal Energies=      | -1353.994060                |

|                              |             |             |             |                                              |                             |
|------------------------------|-------------|-------------|-------------|----------------------------------------------|-----------------------------|
| C                            | -0.11423200 | -1.35822500 | 0.10350300  | Sum of electronic and thermal Enthalpies=    | -1353.993116                |
| C                            | -0.76542300 | -0.09819900 | 0.13518100  | Sum of electronic and thermal Free Energies= | -1354.077086                |
| N                            | 0.17285600  | 0.90320000  | 0.00667900  |                                              |                             |
| C                            | -0.72585500 | -2.69925900 | 0.10656100  |                                              |                             |
| C                            | -2.19067900 | 0.23831600  | -0.11789800 |                                              |                             |
| C                            | 4.95230700  | 0.74792200  | -0.18570600 |                                              |                             |
| C                            | 6.06773800  | -0.04673900 | -0.22188600 |                                              |                             |
| C                            | 5.95183600  | -1.45961900 | -0.19084200 |                                              |                             |
| C                            | 4.72113000  | -2.05344600 | -0.12230700 |                                              |                             |
| C                            | -2.47265500 | 0.92214200  | -1.30360500 |                                              |                             |
| C                            | -3.78390800 | 1.25596800  | -1.62295600 |                                              |                             |
| C                            | -4.81692200 | 0.92205300  | -0.75355400 |                                              |                             |
| C                            | -4.53418900 | 0.24552900  | 0.43037600  |                                              |                             |
| C                            | -3.22747100 | -0.10310900 | 0.74917100  |                                              |                             |
| C                            | -0.07798900 | 2.30218900  | 0.17183700  |                                              |                             |
| C                            | -0.84899900 | 2.73457800  | 1.24642800  |                                              |                             |
| C                            | -1.10114200 | 4.09396800  | 1.39233300  |                                              |                             |
| C                            | -0.57388300 | 5.00721300  | 0.48344600  |                                              |                             |
| C                            | 0.20622700  | 4.56066500  | -0.57965800 |                                              |                             |
| C                            | 0.45420700  | 3.20244700  | -0.74473200 |                                              |                             |
| O                            | -0.08921500 | -3.71902100 | 0.19982000  |                                              |                             |
| O                            | -2.05149800 | -2.65708700 | -0.01621100 |                                              |                             |
| C                            | -2.74005400 | -3.92195000 | 0.00221900  |                                              |                             |
| C                            | -4.21943900 | -3.62280400 | -0.04459200 |                                              |                             |
| H                            | 5.01935000  | 1.82953300  | -0.20766700 |                                              |                             |
| H                            | 7.05124100  | 0.40539700  | -0.27423100 |                                              |                             |
| H                            | 6.84759200  | -2.06858200 | -0.21995500 |                                              |                             |
| H                            | 4.60386200  | -3.13065100 | -0.09493300 |                                              |                             |
| H                            | -1.66689900 | 1.18675800  | -1.97988200 |                                              |                             |
| H                            | -3.99413600 | 1.78049000  | -2.54760900 |                                              |                             |
| H                            | -5.83913000 | 1.18893600  | -0.99638200 |                                              |                             |
| H                            | -5.33680600 | -0.01517500 | 1.11077500  |                                              |                             |
| H                            | -3.00272500 | -0.63307100 | 1.66345800  |                                              |                             |
| H                            | -1.23960700 | 2.00705200  | 1.94878100  |                                              |                             |
| H                            | -1.70576400 | 4.43875700  | 2.22284300  |                                              |                             |
| H                            | -0.77020200 | 6.06624100  | 0.60361200  |                                              |                             |
| H                            | 0.61796400  | 5.26901100  | -1.28882000 |                                              |                             |
| H                            | 1.04974300  | 2.84105700  | -1.57424500 |                                              |                             |
| H                            | -2.41390600 | -4.50876200 | -0.85933200 |                                              |                             |
| H                            | -2.46059600 | -4.46016200 | 0.91006900  |                                              |                             |
| H                            | -4.77890700 | -4.56034900 | -0.06805000 |                                              |                             |
| H                            | -4.52806700 | -3.05755000 | 0.83670400  |                                              |                             |
| H                            | -4.47044900 | -3.04537700 | -0.93668100 |                                              |                             |
| O                            | -0.83820900 | -0.52020200 | 2.21367600  |                                              |                             |
| H                            | 0.09189200  | -0.65566100 | 2.45545800  |                                              |                             |
| <b>Name</b>                  |             |             |             | <b>TS-C14-OH-RAF-G</b>                       |                             |
| <b>Cartesian Coordinates</b> |             |             |             | <b>Energy</b>                                |                             |
| C                            | 1.33459900  | -1.08827800 | 0.17771800  | Zero-point correction=                       | 0.398991 (Hartree/Particle) |
| C                            | 1.52864500  | 0.33669200  | 0.14785400  | Thermal correction to Energy=                | 0.424632                    |
| N                            | 2.68296900  | 0.92844800  | 0.05527200  | Thermal correction to Enthalpy=              | 0.425577                    |
| C                            | 3.74310100  | 0.07505400  | -0.00048100 | Thermal correction to Gibbs Free Energy=     | 0.341280                    |
| C                            | 3.56555100  | -1.34227900 | 0.02464100  | Sum of electronic and zero-point Energies=   | -1353.973791                |
| N                            | 2.34031700  | -1.92126300 | 0.10864300  | Sum of electronic and thermal Energies=      | -1353.948149                |
| C                            | -0.08937700 | -1.30443200 | 0.22131400  | Sum of electronic and thermal Enthalpies=    | -1353.947205                |

|                              |             |             |             |                                              |                             |
|------------------------------|-------------|-------------|-------------|----------------------------------------------|-----------------------------|
| C                            | -0.68367700 | -0.06529000 | 0.22628400  | Sum of electronic and thermal Free Energies= | -1354.031502                |
| N                            | 0.28327500  | 0.93996100  | 0.21471900  |                                              |                             |
| C                            | -0.75084200 | -2.62258800 | 0.17818700  |                                              |                             |
| C                            | -2.12608800 | 0.24548100  | 0.19862800  |                                              |                             |
| C                            | 5.05362000  | 0.60847500  | -0.09183200 |                                              |                             |
| C                            | 6.13435600  | -0.22743200 | -0.15383300 |                                              |                             |
| C                            | 5.96189300  | -1.63559000 | -0.12934000 |                                              |                             |
| C                            | 4.71091700  | -2.17941700 | -0.04290100 |                                              |                             |
| C                            | -2.66016600 | 0.99728600  | -0.84797900 |                                              |                             |
| C                            | -4.02243600 | 1.26806800  | -0.88415300 |                                              |                             |
| C                            | -4.85394600 | 0.80033800  | 0.12877900  |                                              |                             |
| C                            | -4.32184100 | 0.05282300  | 1.17621600  |                                              |                             |
| C                            | -2.96225700 | -0.22962400 | 1.20880500  |                                              |                             |
| C                            | 0.06357100  | 2.35647800  | 0.26064000  |                                              |                             |
| C                            | -1.03432100 | 2.87326300  | 1.00579100  |                                              |                             |
| C                            | -1.46740400 | 4.15890800  | 0.78146500  |                                              |                             |
| C                            | -0.88437300 | 4.94118400  | -0.22087400 |                                              |                             |
| C                            | 0.13893600  | 4.42035400  | -1.01297100 |                                              |                             |
| C                            | 0.58829300  | 3.13030000  | -0.81065700 |                                              |                             |
| O                            | -0.27679700 | -3.63797500 | 0.61008500  |                                              |                             |
| O                            | -1.95462700 | -2.55629000 | -0.41444600 |                                              |                             |
| C                            | -2.73162200 | -3.76127400 | -0.40917800 |                                              |                             |
| C                            | -4.06425800 | -3.42194600 | -1.03908000 |                                              |                             |
| H                            | 5.16141900  | 1.68647200  | -0.10734500 |                                              |                             |
| H                            | 7.13361100  | 0.18583800  | -0.22055600 |                                              |                             |
| H                            | 6.83147400  | -2.27969300 | -0.17791500 |                                              |                             |
| H                            | 4.54585000  | -3.24973400 | -0.02001700 |                                              |                             |
| H                            | -2.00757100 | 1.36739100  | -1.63162500 |                                              |                             |
| H                            | -4.43354400 | 1.84753800  | -1.70186900 |                                              |                             |
| H                            | -5.91502800 | 1.01827700  | 0.10281200  |                                              |                             |
| H                            | -4.96641600 | -0.31065500 | 1.96769700  |                                              |                             |
| H                            | -2.53990900 | -0.81406000 | 2.01883100  |                                              |                             |
| H                            | -1.45837700 | 2.26742000  | 1.79492600  |                                              |                             |
| H                            | -2.26741500 | 4.56393200  | 1.38838500  |                                              |                             |
| H                            | -1.23623200 | 5.95171100  | -0.38909500 |                                              |                             |
| H                            | 0.57010100  | 5.01868100  | -1.80614100 |                                              |                             |
| H                            | 1.35855000  | 2.69580300  | -1.43560800 |                                              |                             |
| H                            | -2.19331300 | -4.53246100 | -0.96417700 |                                              |                             |
| H                            | -2.83864400 | -4.10602100 | 0.62219700  |                                              |                             |
| H                            | -4.71240100 | -4.30008400 | -1.03990500 |                                              |                             |
| H                            | -4.55449900 | -2.62183400 | -0.48115000 |                                              |                             |
| H                            | -3.92694300 | -3.08915700 | -2.06889700 |                                              |                             |
| O                            | 1.33280900  | 2.85342900  | 1.67177900  |                                              |                             |
| H                            | 2.14973800  | 2.67247000  | 1.17701900  |                                              |                             |
| <b>Name</b>                  |             |             |             | <b>TS-C15-OH-RAF-G</b>                       |                             |
| <b>Cartesian Coordinates</b> |             |             |             | <b>Energy</b>                                |                             |
| C                            | 1.24345400  | -1.05787900 | 0.10660700  | Zero-point correction=                       | 0.398750 (Hartree/Particle) |
| C                            | 1.39969900  | 0.36209300  | -0.05692700 | Thermal correction to Energy=                | 0.424864                    |
| N                            | 2.53033400  | 0.99485900  | -0.11338000 | Thermal correction to Enthalpy=              | 0.425808                    |
| C                            | 3.61792200  | 0.17817500  | -0.02603600 | Thermal correction to Gibbs Free Energy=     | 0.339099                    |
| C                            | 3.48524200  | -1.23950900 | 0.10140000  | Sum of electronic and zero-point Energies=   | -1353.981269                |
| N                            | 2.27674700  | -1.85670900 | 0.16743500  | Sum of electronic and thermal Energies=      | -1353.955156                |
| C                            | -0.17649300 | -1.31233200 | 0.14206600  | Sum of electronic and thermal Enthalpies=    | -1353.954212                |
| C                            | -0.80640800 | -0.09596100 | 0.02661600  | Sum of electronic and thermal Free Energies= | -1354.040921                |

|                       |             |             |             |                                                           |
|-----------------------|-------------|-------------|-------------|-----------------------------------------------------------|
| N                     | 0.13093300  | 0.92399300  | -0.11402700 |                                                           |
| C                     | -0.80042100 | -2.64671000 | 0.21864900  |                                                           |
| C                     | -2.24638000 | 0.21334600  | 0.03322200  |                                                           |
| C                     | 4.91402500  | 0.75095300  | -0.07254500 |                                                           |
| C                     | 6.02332900  | -0.04605300 | 0.00008900  |                                                           |
| C                     | 5.89505100  | -1.45366700 | 0.12207900  |                                                           |
| C                     | 4.65915500  | -2.03557200 | 0.17189400  |                                                           |
| C                     | -2.80125300 | 1.02206300  | -0.95970800 |                                                           |
| C                     | -4.16038800 | 1.31246500  | -0.94185300 |                                                           |
| C                     | -4.96867300 | 0.80839000  | 0.07206800  |                                                           |
| C                     | -4.41609300 | 0.00784600  | 1.06866100  |                                                           |
| C                     | -3.06063500 | -0.29172000 | 1.04881100  |                                                           |
| C                     | -0.09864100 | 2.31937900  | -0.02882700 |                                                           |
| C                     | -0.82992800 | 2.84148400  | 1.06694300  |                                                           |
| C                     | -1.06216900 | 4.23535500  | 1.10935000  |                                                           |
| C                     | -0.47213500 | 5.07319800  | 0.18421100  |                                                           |
| C                     | 0.31836900  | 4.54055700  | -0.83959000 |                                                           |
| C                     | 0.50346700  | 3.16509500  | -0.94798200 |                                                           |
| O                     | -0.30765900 | -3.60256600 | 0.75293100  |                                                           |
| O                     | -1.99693300 | -2.67104000 | -0.39355500 |                                                           |
| C                     | -2.74205900 | -3.89046000 | -0.27633200 |                                                           |
| C                     | -4.07510700 | -3.65404800 | -0.95066200 |                                                           |
| H                     | 4.98603200  | 1.82787700  | -0.16624400 |                                                           |
| H                     | 7.01103200  | 0.39786500  | -0.03501700 |                                                           |
| H                     | 6.78617900  | -2.06699100 | 0.17870700  |                                                           |
| H                     | 4.52782800  | -3.10635000 | 0.26973900  |                                                           |
| H                     | -2.17013400 | 1.41336200  | -1.74977000 |                                                           |
| H                     | -4.58735800 | 1.93312200  | -1.72026500 |                                                           |
| H                     | -6.02671000 | 1.04137100  | 0.08818700  |                                                           |
| H                     | -5.04123200 | -0.37992200 | 1.86413400  |                                                           |
| H                     | -2.62181800 | -0.90941100 | 1.82451400  |                                                           |
| H                     | -1.43256600 | 2.17744600  | 1.67034400  |                                                           |
| H                     | -1.67375600 | 4.63514700  | 1.90791300  |                                                           |
| H                     | -0.62406100 | 6.14371100  | 0.24655500  |                                                           |
| H                     | 0.78394100  | 5.19898400  | -1.56270100 |                                                           |
| H                     | 1.11258800  | 2.74397800  | -1.73719200 |                                                           |
| H                     | -2.17622800 | -4.69808100 | -0.74540400 |                                                           |
| H                     | -2.85336600 | -4.13379400 | 0.78325200  |                                                           |
| H                     | -4.69847100 | -4.54628000 | -0.86990700 |                                                           |
| H                     | -4.59495500 | -2.81700300 | -0.48078500 |                                                           |
| H                     | -3.93376000 | -3.42233400 | -2.00724200 |                                                           |
| O                     | 0.59843700  | 2.58879300  | 2.43358600  |                                                           |
| H                     | 1.37476400  | 2.89759700  | 1.93892700  |                                                           |
| <b>Name</b>           |             |             |             | <b>TS-C16-OH-RAF-G</b>                                    |
| Cartesian Coordinates |             |             |             | Energy                                                    |
| C                     | 1.26441900  | -1.10587600 | 0.10531900  | Zero-point correction= 0.398539 (Hartree/Particle)        |
| C                     | 1.43215500  | 0.31773400  | -0.01420800 | Thermal correction to Energy= 0.424689                    |
| N                     | 2.56926100  | 0.94089500  | -0.07287100 | Thermal correction to Enthalpy= 0.425633                  |
| C                     | 3.64894000  | 0.11178500  | -0.02555600 | Thermal correction to Gibbs Free Energy= 0.338707         |
| C                     | 3.50436500  | -1.30810300 | 0.06590300  | Sum of electronic and zero-point Energies= -1353.977961   |
| N                     | 2.29165500  | -1.91578800 | 0.12978600  | Sum of electronic and thermal Energies= -1353.951811      |
| C                     | -0.15646700 | -1.34820900 | 0.13969700  | Sum of electronic and thermal Enthalpies= -1353.950867    |
| C                     | -0.77625300 | -0.12259300 | 0.06021600  | Sum of electronic and thermal Free Energies= -1354.037793 |
| N                     | 0.17045900  | 0.89245300  | -0.03794100 |                                                           |

|                              |             |             |             |                                                           |
|------------------------------|-------------|-------------|-------------|-----------------------------------------------------------|
| C                            | -0.79637500 | -2.67657900 | 0.18570200  |                                                           |
| C                            | -2.21700100 | 0.18715000  | 0.07698600  |                                                           |
| C                            | 4.95026000  | 0.67339200  | -0.07757800 |                                                           |
| C                            | 6.05232100  | -0.13557300 | -0.04302400 |                                                           |
| C                            | 5.91216400  | -1.54510000 | 0.04408100  |                                                           |
| C                            | 4.67195300  | -2.11668400 | 0.09748200  |                                                           |
| C                            | -2.78120400 | 0.99642000  | -0.90999300 |                                                           |
| C                            | -4.14289500 | 1.27237800  | -0.88932100 |                                                           |
| C                            | -4.94544300 | 0.75367200  | 0.12218600  |                                                           |
| C                            | -4.38410500 | -0.04749200 | 1.11283000  |                                                           |
| C                            | -3.02536800 | -0.33316100 | 1.08911200  |                                                           |
| C                            | -0.05755800 | 2.29823400  | 0.02725200  |                                                           |
| C                            | -0.82750100 | 2.83754300  | 1.04115700  |                                                           |
| C                            | -1.00544700 | 4.23886600  | 1.11764200  |                                                           |
| C                            | -0.48259200 | 5.05216500  | 0.08308800  |                                                           |
| C                            | 0.29670200  | 4.49473700  | -0.91383800 |                                                           |
| C                            | 0.51608200  | 3.11743400  | -0.94936800 |                                                           |
| O                            | -0.32424000 | -3.64582000 | 0.71485800  |                                                           |
| O                            | -1.98223200 | -2.67645600 | -0.44624900 |                                                           |
| C                            | -2.75064900 | -3.88338200 | -0.35189800 |                                                           |
| C                            | -4.07088600 | -3.61406900 | -1.03898900 |                                                           |
| H                            | 5.03091000  | 1.75174100  | -0.14323400 |                                                           |
| H                            | 7.04372100  | 0.29970500  | -0.08166800 |                                                           |
| H                            | 6.79810400  | -2.16790600 | 0.07052400  |                                                           |
| H                            | 4.53189800  | -3.18849200 | 0.16822200  |                                                           |
| H                            | -2.15433100 | 1.40123100  | -1.69667700 |                                                           |
| H                            | -4.57699300 | 1.89344600  | -1.66346300 |                                                           |
| H                            | -6.00583400 | 0.97548500  | 0.14025700  |                                                           |
| H                            | -5.00465600 | -0.44816800 | 1.90548000  |                                                           |
| H                            | -2.58126600 | -0.95658700 | 1.85745100  |                                                           |
| H                            | -1.25974100 | 2.19859700  | 1.80082400  |                                                           |
| H                            | -1.76659800 | 4.63538200  | 1.77456800  |                                                           |
| H                            | -0.65904200 | 6.11965500  | 0.11488500  |                                                           |
| H                            | 0.73275600  | 5.12352100  | -1.68010800 |                                                           |
| H                            | 1.12631600  | 2.66977100  | -1.72336100 |                                                           |
| H                            | -2.19407600 | -4.69597900 | -0.82341100 |                                                           |
| H                            | -2.87921700 | -4.13614400 | 0.70356100  |                                                           |
| H                            | -4.71277900 | -4.49439100 | -0.97443000 |                                                           |
| H                            | -4.57905700 | -2.77131300 | -0.56636300 |                                                           |
| H                            | -3.91270000 | -3.37482500 | -2.09149400 |                                                           |
| O                            | 0.28480700  | 4.65377900  | 2.56299800  |                                                           |
| H                            | 1.09141300  | 4.29114500  | 2.16450300  |                                                           |
| <b>Name</b>                  |             |             |             | <b>TS-C18-OH-RAF-G</b>                                    |
| <b>Cartesian Coordinates</b> |             |             |             | <b>Energy</b>                                             |
| C                            | 1.23217600  | -1.03305500 | 0.08144400  | Zero-point correction= 0.398857 (Hartree/Particle)        |
| C                            | 1.36866200  | 0.39034400  | -0.06519600 | Thermal correction to Energy= 0.424858                    |
| N                            | 2.49083200  | 1.04363300  | -0.10645100 | Thermal correction to Enthalpy= 0.425802                  |
| C                            | 3.59033500  | 0.24278200  | -0.03060400 | Thermal correction to Gibbs Free Energy= 0.339211         |
| C                            | 3.47754100  | -1.17941700 | 0.07792300  | Sum of electronic and zero-point Energies= -1353.978784   |
| N                            | 2.27928300  | -1.81611800 | 0.13623200  | Sum of electronic and thermal Energies= -1353.952784      |
| C                            | -0.18478100 | -1.30424300 | 0.11492900  | Sum of electronic and thermal Enthalpies= -1353.951839    |
| C                            | -0.83035100 | -0.09262100 | 0.00860100  | Sum of electronic and thermal Free Energies= -1354.038431 |
| N                            | 0.09601200  | 0.93518900  | -0.11875300 |                                                           |
| C                            | -0.79481000 | -2.64482900 | 0.18975000  |                                                           |

|                       |             |             |             |                                                           |
|-----------------------|-------------|-------------|-------------|-----------------------------------------------------------|
| C                     | -2.27237800 | 0.20522800  | 0.03670300  |                                                           |
| C                     | 4.87751800  | 0.83635600  | -0.07012200 |                                                           |
| C                     | 5.99793300  | 0.05485600  | -0.00760900 |                                                           |
| C                     | 5.89056800  | -1.35639600 | 0.09706200  |                                                           |
| C                     | 4.66420300  | -1.95801200 | 0.13935300  |                                                           |
| C                     | -2.84644700 | 1.02691300  | -0.93446100 |                                                           |
| C                     | -4.20872400 | 1.29897700  | -0.89953800 |                                                           |
| C                     | -5.00195400 | 0.76438900  | 0.11065600  |                                                           |
| C                     | -4.43083200 | -0.04825200 | 1.08652600  |                                                           |
| C                     | -3.07188500 | -0.32980900 | 1.04888200  |                                                           |
| C                     | -0.11875200 | 2.34229500  | -0.05184200 |                                                           |
| C                     | -0.79281600 | 2.90884200  | 1.02970700  |                                                           |
| C                     | -0.90447400 | 4.29927900  | 1.11751600  |                                                           |
| C                     | -0.30162600 | 5.10845900  | 0.17693300  |                                                           |
| C                     | 0.45247100  | 4.53922200  | -0.88250900 |                                                           |
| C                     | 0.43597200  | 3.13358500  | -1.04159900 |                                                           |
| O                     | -0.29532000 | -3.59466500 | 0.72911800  |                                                           |
| O                     | -1.98741600 | -2.68207400 | -0.42874200 |                                                           |
| C                     | -2.72215200 | -3.90807000 | -0.31258600 |                                                           |
| C                     | -4.05440100 | -3.68477500 | -0.99283200 |                                                           |
| H                     | 4.93415200  | 1.91535100  | -0.15392400 |                                                           |
| H                     | 6.97881800  | 0.51376200  | -0.03893800 |                                                           |
| H                     | 6.79099700  | -1.95667200 | 0.14559200  |                                                           |
| H                     | 4.54954400  | -3.03189400 | 0.22288000  |                                                           |
| H                     | -2.22740300 | 1.44291600  | -1.72122900 |                                                           |
| H                     | -4.65023300 | 1.92967800  | -1.66154400 |                                                           |
| H                     | -6.06278500 | 0.98289200  | 0.13974200  |                                                           |
| H                     | -5.04435700 | -0.46082800 | 1.87856100  |                                                           |
| H                     | -2.62045900 | -0.96154800 | 1.80596500  |                                                           |
| H                     | -1.22156300 | 2.26630500  | 1.78959800  |                                                           |
| H                     | -1.44995800 | 4.73773500  | 1.94390200  |                                                           |
| H                     | -0.35762200 | 6.18612700  | 0.26190800  |                                                           |
| H                     | 0.73922000  | 5.15904600  | -1.72009400 |                                                           |
| H                     | 0.94834400  | 2.67458000  | -1.87781500 |                                                           |
| H                     | -2.14699100 | -4.71126400 | -0.77782000 |                                                           |
| H                     | -2.83574500 | -4.15053200 | 0.74700000  |                                                           |
| H                     | -4.66993200 | -4.58252000 | -0.91332400 |                                                           |
| H                     | -4.58382600 | -2.85182700 | -0.52635800 |                                                           |
| H                     | -3.91076000 | -3.45344400 | -2.04915500 |                                                           |
| O                     | 2.28102300  | 4.66417200  | -0.20270700 |                                                           |
| H                     | 2.42936200  | 3.74234400  | 0.07030400  |                                                           |
| <b>Name</b>           |             |             |             | <b>TS-C19-OH-RAF-G</b>                                    |
| Cartesian Coordinates |             |             |             | Energy                                                    |
| C                     | 1.29814900  | -1.06286700 | 0.18235100  | Zero-point correction= 0.398980 (Hartree/Particle)        |
| C                     | 1.49940700  | 0.34240400  | -0.04380100 | Thermal correction to Energy= 0.424862                    |
| N                     | 2.64718000  | 0.89194000  | -0.28379800 | Thermal correction to Enthalpy= 0.425806                  |
| C                     | 3.69603200  | 0.02613900  | -0.26011800 | Thermal correction to Gibbs Free Energy= 0.340554         |
| C                     | 3.51477600  | -1.37157200 | -0.02877300 | Sum of electronic and zero-point Energies= -1353.971883   |
| N                     | 2.28828700  | -1.91660200 | 0.17758000  | Sum of electronic and thermal Energies= -1353.946001      |
| C                     | -0.12337500 | -1.26141500 | 0.29536800  | Sum of electronic and thermal Enthalpies= -1353.945057    |
| C                     | -0.71719700 | -0.03392000 | 0.16862700  | Sum of electronic and thermal Free Energies= -1354.030309 |
| N                     | 0.24779200  | 0.96911300  | 0.00132900  |                                                           |
| C                     | -0.80130900 | -2.56956500 | 0.42526300  |                                                           |
| C                     | -2.16710900 | 0.23260700  | 0.12132400  |                                                           |



|                              |             |             |             |                                                           |
|------------------------------|-------------|-------------|-------------|-----------------------------------------------------------|
| C                            | 5.00255700  | 0.53113700  | -0.48146100 |                                                           |
| C                            | 6.07652300  | -0.31546100 | -0.47046400 |                                                           |
| C                            | 5.89942000  | -1.70533800 | -0.24322000 |                                                           |
| C                            | 4.65208100  | -2.22184800 | -0.02852700 |                                                           |
| C                            | -2.72350800 | 0.92272400  | -0.95596200 |                                                           |
| C                            | -4.09643100 | 1.12397800  | -1.01778100 |                                                           |
| C                            | -4.92018100 | 0.64576600  | -0.00241200 |                                                           |
| C                            | -4.36733900 | -0.04142900 | 1.07450400  |                                                           |
| C                            | -2.99510200 | -0.25076900 | 1.13517400  |                                                           |
| C                            | 0.02483600  | 2.36684200  | 0.06540100  |                                                           |
| C                            | -1.01261900 | 2.89357100  | 0.82898700  |                                                           |
| C                            | -1.30875800 | 4.25140400  | 0.76067000  |                                                           |
| C                            | -0.57609700 | 5.10583800  | -0.06887700 |                                                           |
| C                            | 0.50207200  | 4.60423800  | -0.77004200 |                                                           |
| C                            | 0.89254200  | 3.24831000  | -0.63224600 |                                                           |
| O                            | -0.42403400 | -3.46639600 | 1.12849500  |                                                           |
| O                            | -1.89936300 | -2.63226500 | -0.34303300 |                                                           |
| C                            | -2.73045700 | -3.78822000 | -0.16950900 |                                                           |
| C                            | -3.96231100 | -3.56957700 | -1.01913000 |                                                           |
| H                            | 5.10614800  | 1.59746300  | -0.64253400 |                                                           |
| H                            | 7.07424500  | 0.07414100  | -0.63351100 |                                                           |
| H                            | 6.76404000  | -2.35813300 | -0.23893200 |                                                           |
| H                            | 4.48611200  | -3.27745500 | 0.14918500  |                                                           |
| H                            | -2.07919800 | 1.29556800  | -1.74448100 |                                                           |
| H                            | -4.52418900 | 1.65444300  | -1.85991400 |                                                           |
| H                            | -5.99027800 | 0.80875600  | -0.05046400 |                                                           |
| H                            | -5.00431600 | -0.41356200 | 1.86810300  |                                                           |
| H                            | -2.55695100 | -0.78493700 | 1.97178800  |                                                           |
| H                            | -1.60601400 | 2.25073800  | 1.46332900  |                                                           |
| H                            | -2.12763600 | 4.64085400  | 1.35329100  |                                                           |
| H                            | -0.84322400 | 6.15215900  | -0.14748900 |                                                           |
| H                            | 1.11486800  | 5.25047400  | -1.38582200 |                                                           |
| H                            | 1.64156200  | 2.83294600  | -1.28915000 |                                                           |
| H                            | -2.16963400 | -4.67672300 | -0.46676100 |                                                           |
| H                            | -2.97444400 | -3.88605400 | 0.89149200  |                                                           |
| H                            | -4.65034600 | -4.40892700 | -0.90382700 |                                                           |
| H                            | -4.47068700 | -2.65174100 | -0.71677300 |                                                           |
| H                            | -3.69097800 | -3.48380000 | -2.07221000 |                                                           |
| O                            | 2.29249100  | 3.59404600  | 0.73554100  |                                                           |
| H                            | 1.81961100  | 4.24333600  | 1.27916600  |                                                           |
| <b>Name</b>                  |             |             |             | <b>TS-C23-OH-FHT-G</b>                                    |
| <b>Cartesian Coordinates</b> |             |             |             | <b>Energy</b>                                             |
| C                            | 1.21982800  | -1.15071100 | 0.09504700  | Zero-point correction= 0.394437 (Hartree/Particle)        |
| C                            | 1.40540000  | 0.26981200  | -0.02532400 | Thermal correction to Energy= 0.420284                    |
| N                            | 2.55028200  | 0.87612200  | -0.09720500 | Thermal correction to Enthalpy= 0.421228                  |
| C                            | 3.61830600  | 0.03265800  | -0.05901500 | Thermal correction to Gibbs Free Energy= 0.335164         |
| C                            | 3.45584500  | -1.38490400 | 0.03771900  | Sum of electronic and zero-point Energies= -1353.986009   |
| N                            | 2.23551000  | -1.97541100 | 0.11351600  | Sum of electronic and thermal Energies= -1353.960163      |
| C                            | -0.20457800 | -1.37304800 | 0.13681400  | Sum of electronic and thermal Enthalpies= -1353.959218    |
| C                            | -0.80829600 | -0.13527400 | 0.06121000  | Sum of electronic and thermal Free Energies= -1354.045283 |
| N                            | 0.14958600  | 0.86247100  | -0.03642500 |                                                           |
| C                            | -0.85164500 | -2.68924200 | 0.15952000  |                                                           |
| C                            | -2.24479600 | 0.19694300  | 0.07896800  |                                                           |
| C                            | 4.92650300  | 0.57722300  | -0.12499900 |                                                           |

|                       |             |             |             |                                                           |
|-----------------------|-------------|-------------|-------------|-----------------------------------------------------------|
| C                     | 6.01774500  | -0.24626100 | -0.09916300 |                                                           |
| C                     | 5.85960200  | -1.65379900 | -0.00720700 |                                                           |
| C                     | 4.61275800  | -2.20908400 | 0.05977600  |                                                           |
| C                     | -2.79980900 | 0.98820000  | -0.92706900 |                                                           |
| C                     | -4.15643000 | 1.28805100  | -0.90652500 |                                                           |
| C                     | -4.96149400 | 0.81284800  | 0.12398000  |                                                           |
| C                     | -4.40829400 | 0.03073600  | 1.13440900  |                                                           |
| C                     | -3.05512200 | -0.28009400 | 1.11049200  |                                                           |
| C                     | -0.06708500 | 2.27342300  | 0.00288000  |                                                           |
| C                     | -0.83421800 | 2.83534200  | 1.01883400  |                                                           |
| C                     | -1.04529000 | 4.20841500  | 1.03376200  |                                                           |
| C                     | -0.47770800 | 5.01529300  | 0.05254000  |                                                           |
| C                     | 0.30383200  | 4.44586400  | -0.94758100 |                                                           |
| C                     | 0.50879000  | 3.07170000  | -0.97982600 |                                                           |
| O                     | -0.34961300 | -3.69628700 | 0.58938700  |                                                           |
| O                     | -2.08681700 | -2.65646800 | -0.37863500 |                                                           |
| C                     | -2.86001900 | -3.83754500 | -0.28587400 |                                                           |
| C                     | -4.19861300 | -3.58098700 | -0.92480300 |                                                           |
| H                     | 5.01986000  | 1.65429100  | -0.19409300 |                                                           |
| H                     | 7.01452000  | 0.17538800  | -0.14883300 |                                                           |
| H                     | 6.73744900  | -2.28826600 | 0.01113900  |                                                           |
| H                     | 4.45977100  | -3.27893300 | 0.13305800  |                                                           |
| H                     | -2.16990800 | 1.36185300  | -1.72649500 |                                                           |
| H                     | -4.58397300 | 1.89540200  | -1.69496900 |                                                           |
| H                     | -6.01773100 | 1.05373700  | 0.14164500  |                                                           |
| H                     | -5.03097700 | -0.33593700 | 1.94177200  |                                                           |
| H                     | -2.61728900 | -0.88997700 | 1.89313500  |                                                           |
| H                     | -1.26454000 | 2.19944900  | 1.78302800  |                                                           |
| H                     | -1.64777000 | 4.64761900  | 1.81943100  |                                                           |
| H                     | -0.63986300 | 6.08615800  | 0.07065700  |                                                           |
| H                     | 0.75340600  | 5.07099700  | -1.70938100 |                                                           |
| H                     | 1.11614900  | 2.61415900  | -1.75036500 |                                                           |
| H                     | -2.30749600 | -4.69378500 | -0.87118800 |                                                           |
| H                     | -2.90515600 | -4.18154200 | 0.75035100  |                                                           |
| H                     | -4.81681700 | -4.47725500 | -0.86558800 |                                                           |
| H                     | -4.70803800 | -2.76049500 | -0.41179000 |                                                           |
| H                     | -4.07209200 | -3.30812600 | -1.97305800 |                                                           |
| O                     | -1.38089100 | -5.61956000 | -1.34380300 |                                                           |
| H                     | -0.67996000 | -5.37573200 | -0.71270500 |                                                           |
| <b>Name</b>           |             |             |             | <b>TS-C23-OH-FHT-P</b>                                    |
| Cartesian Coordinates |             |             |             | Energy                                                    |
| C                     | 1.22063200  | -1.15159100 | 0.07963500  | Zero-point correction= 0.394147 (Hartree/Particle)        |
| C                     | 1.40718900  | 0.27163700  | -0.03610500 | Thermal correction to Energy= 0.419994                    |
| N                     | 2.55386000  | 0.87420400  | -0.09961900 | Thermal correction to Enthalpy= 0.420938                  |
| C                     | 3.62437500  | 0.03186100  | -0.06098800 | Thermal correction to Gibbs Free Energy= 0.335094         |
| C                     | 3.46232900  | -1.38577600 | 0.02961800  | Sum of electronic and zero-point Energies= -1354.021621   |
| N                     | 2.23839300  | -1.97428100 | 0.09951100  | Sum of electronic and thermal Energies= -1353.995774      |
| C                     | -0.20247100 | -1.37093000 | 0.11089300  | Sum of electronic and thermal Enthalpies= -1353.994830    |
| C                     | -0.80394300 | -0.12935300 | 0.03529300  | Sum of electronic and thermal Free Energies= -1354.080674 |
| N                     | 0.15483700  | 0.86349600  | -0.05381400 |                                                           |
| C                     | -0.86336800 | -2.67706800 | 0.15114200  |                                                           |
| C                     | -2.23956800 | 0.20117800  | 0.06648200  |                                                           |
| C                     | 4.93192000  | 0.57806200  | -0.12093900 |                                                           |
| C                     | 6.02469800  | -0.24516700 | -0.09516100 |                                                           |

|                       |             |             |             |                                                           |
|-----------------------|-------------|-------------|-------------|-----------------------------------------------------------|
| C                     | 5.86685300  | -1.65270500 | -0.00899700 |                                                           |
| C                     | 4.61907300  | -2.20945200 | 0.05222200  |                                                           |
| C                     | -2.80192500 | 1.01642600  | -0.91765100 |                                                           |
| C                     | -4.16016900 | 1.31001600  | -0.88064500 |                                                           |
| C                     | -4.95737200 | 0.80498400  | 0.14285600  |                                                           |
| C                     | -4.39624100 | -0.00255500 | 1.12937200  |                                                           |
| C                     | -3.04174000 | -0.30859000 | 1.09001300  |                                                           |
| C                     | -0.06378600 | 2.27689200  | -0.00124900 |                                                           |
| C                     | -0.75240400 | 2.83019300  | 1.07345500  |                                                           |
| C                     | -0.96966900 | 4.20286300  | 1.10589600  |                                                           |
| C                     | -0.48671800 | 5.01254800  | 0.08141200  |                                                           |
| C                     | 0.21457100  | 4.44880400  | -0.98060400 |                                                           |
| C                     | 0.42493300  | 3.07506200  | -1.02973400 |                                                           |
| O                     | -0.40191000 | -3.66592500 | 0.67159900  |                                                           |
| O                     | -2.04946100 | -2.66905700 | -0.47954200 |                                                           |
| C                     | -2.88298000 | -3.80510700 | -0.31852900 |                                                           |
| C                     | -4.16753000 | -3.56876400 | -1.06339700 |                                                           |
| H                     | 5.02884600  | 1.65572700  | -0.18695000 |                                                           |
| H                     | 7.02171700  | 0.17709900  | -0.14104300 |                                                           |
| H                     | 6.74523600  | -2.28710900 | 0.00909500  |                                                           |
| H                     | 4.47252800  | -3.28131100 | 0.12058600  |                                                           |
| H                     | -2.18078800 | 1.40903800  | -1.71517400 |                                                           |
| H                     | -4.59499900 | 1.93546300  | -1.65132100 |                                                           |
| H                     | -6.01467800 | 1.04179500  | 0.17297000  |                                                           |
| H                     | -5.01314500 | -0.39265300 | 1.93055000  |                                                           |
| H                     | -2.59839000 | -0.93362300 | 1.85835000  |                                                           |
| H                     | -1.11555100 | 2.18963300  | 1.86902400  |                                                           |
| H                     | -1.51060200 | 4.63933000  | 1.93709100  |                                                           |
| H                     | -0.65449400 | 6.08273400  | 0.11247900  |                                                           |
| H                     | 0.59420000  | 5.07678000  | -1.77786600 |                                                           |
| H                     | 0.95952800  | 2.62103800  | -1.85541000 |                                                           |
| H                     | -2.34051800 | -4.73152000 | -0.77330100 |                                                           |
| H                     | -3.01182700 | -4.03153100 | 0.74292500  |                                                           |
| H                     | -4.81998200 | -4.43644200 | -0.95487600 |                                                           |
| H                     | -4.67838000 | -2.69009600 | -0.65899300 |                                                           |
| H                     | -3.97338300 | -3.40342200 | -2.12446000 |                                                           |
| O                     | -1.38108900 | -5.74897000 | -1.08464400 |                                                           |
| H                     | -0.72382400 | -5.40843500 | -0.45030900 |                                                           |
| <b>Name</b>           |             |             |             | <b>TS-C24-OH-FHT-G</b>                                    |
| Cartesian Coordinates |             |             |             | Energy                                                    |
| C                     | 1.26930000  | -1.11057000 | 0.11587900  | Zero-point correction= 0.392923 (Hartree/Particle)        |
| C                     | 1.43588900  | 0.31427500  | -0.00195500 | Thermal correction to Energy= 0.418399                    |
| N                     | 2.57591100  | 0.93878200  | -0.07077200 | Thermal correction to Enthalpy= 0.419343                  |
| C                     | 3.65529900  | 0.10845900  | -0.03206700 | Thermal correction to Gibbs Free Energy= 0.335743         |
| C                     | 3.51188400  | -1.31387900 | 0.06425400  | Sum of electronic and zero-point Energies= -1353.976961   |
| N                     | 2.29945500  | -1.92319600 | 0.13718900  | Sum of electronic and thermal Energies= -1353.951485      |
| C                     | -0.15172400 | -1.35385700 | 0.15593700  | Sum of electronic and thermal Enthalpies= -1353.950541    |
| C                     | -0.77243500 | -0.12316600 | 0.08012900  | Sum of electronic and thermal Free Energies= -1354.034140 |
| N                     | 0.17309600  | 0.89008800  | -0.01537300 |                                                           |
| C                     | -0.78471800 | -2.68305700 | 0.16477600  |                                                           |
| C                     | -2.21467400 | 0.19166100  | 0.09425800  |                                                           |
| C                     | 4.95783800  | 0.67174800  | -0.09585700 |                                                           |
| C                     | 6.06336400  | -0.13811700 | -0.06805700 |                                                           |
| C                     | 5.92426600  | -1.54999300 | 0.02382900  |                                                           |

|                       |             |             |             |                                                           |
|-----------------------|-------------|-------------|-------------|-----------------------------------------------------------|
| C                     | 4.68166900  | -2.12315800 | 0.08846600  |                                                           |
| C                     | -2.78575500 | 0.94526200  | -0.93455100 |                                                           |
| C                     | -4.14889000 | 1.22849600  | -0.91759800 |                                                           |
| C                     | -4.94504600 | 0.77478500  | 0.13306600  |                                                           |
| C                     | -4.37587500 | 0.02973100  | 1.16657500  |                                                           |
| C                     | -3.01607100 | -0.26507700 | 1.14520000  |                                                           |
| C                     | -0.06373500 | 2.29709100  | 0.01556700  |                                                           |
| C                     | -0.83839900 | 2.85611400  | 1.03131800  |                                                           |
| C                     | -1.06885100 | 4.22900700  | 1.03892100  |                                                           |
| C                     | -0.51206000 | 5.04015700  | 0.05094700  |                                                           |
| C                     | 0.27656400  | 4.47410300  | -0.94964800 |                                                           |
| C                     | 0.49969700  | 3.09975200  | -0.97478900 |                                                           |
| O                     | -0.26871200 | -3.69444600 | 0.57658300  |                                                           |
| O                     | -2.02524800 | -2.64925100 | -0.36333200 |                                                           |
| C                     | -2.74344500 | -3.88102800 | -0.35368600 |                                                           |
| C                     | -4.11087000 | -3.59118400 | -0.90964200 |                                                           |
| H                     | 5.03679100  | 1.75252700  | -0.16491500 |                                                           |
| H                     | 7.05642700  | 0.29872600  | -0.11621700 |                                                           |
| H                     | 6.81264800  | -2.17401400 | 0.04391300  |                                                           |
| H                     | 4.54273600  | -3.19744300 | 0.16170900  |                                                           |
| H                     | -2.16345600 | 1.29911000  | -1.75217000 |                                                           |
| H                     | -4.58848400 | 1.80399000  | -1.72638500 |                                                           |
| H                     | -6.00686800 | 1.00253200  | 0.14786500  |                                                           |
| H                     | -4.99132900 | -0.32125000 | 1.98991200  |                                                           |
| H                     | -2.56593400 | -0.84893500 | 1.94422100  |                                                           |
| H                     | -1.26014400 | 2.21737900  | 1.80153200  |                                                           |
| H                     | -1.67861600 | 4.66474300  | 1.82442600  |                                                           |
| H                     | -0.68920200 | 6.11129100  | 0.06339200  |                                                           |
| H                     | 0.71722600  | 5.10188600  | -1.71804600 |                                                           |
| H                     | 1.11090100  | 2.64515700  | -1.74759100 |                                                           |
| H                     | -2.20297400 | -4.62240100 | -0.95083100 |                                                           |
| H                     | -2.80059100 | -4.25807800 | 0.67594200  |                                                           |
| H                     | -4.75786800 | -4.47124400 | -0.91614100 |                                                           |
| H                     | -4.59646500 | -2.73292300 | -0.43763300 |                                                           |
| H                     | -3.96054900 | -3.25370900 | -2.05413200 |                                                           |
| O                     | -3.76537500 | -3.11318500 | -3.37358300 |                                                           |
| H                     | -4.34066400 | -3.83178400 | -3.70222100 |                                                           |
| <b>Name</b>           |             |             |             | <b>TS-C25-OH-RAF-G</b>                                    |
| Cartesian Coordinates |             |             |             | Energy                                                    |
| C                     | 1.26996200  | -1.15408000 | -0.21463800 | Zero-point correction= 0.398673 (Hartree/Particle)        |
| C                     | 1.39957400  | 0.27592300  | -0.14933400 | Thermal correction to Energy= 0.424494                    |
| N                     | 2.51828100  | 0.92456400  | -0.02692300 | Thermal correction to Enthalpy= 0.425438                  |
| C                     | 3.61388400  | 0.11821900  | 0.01659100  | Thermal correction to Gibbs Free Energy= 0.341286         |
| C                     | 3.50723700  | -1.30674300 | -0.05537300 | Sum of electronic and zero-point Energies= -1353.974072   |
| N                     | 2.31337500  | -1.94272600 | -0.16397500 | Sum of electronic and thermal Energies= -1353.948251      |
| C                     | -0.13864200 | -1.43865900 | -0.30125400 | Sum of electronic and thermal Enthalpies= -1353.947307    |
| C                     | -0.79144100 | -0.23504700 | -0.30648500 | Sum of electronic and thermal Free Energies= -1354.031458 |
| N                     | 0.12639500  | 0.81794700  | -0.20956500 |                                                           |
| C                     | -0.73024200 | -2.77863300 | -0.50991400 |                                                           |
| C                     | -2.23866300 | 0.08057200  | -0.46870100 |                                                           |
| C                     | 4.89759800  | 0.71014700  | 0.13937000  |                                                           |
| C                     | 6.01734800  | -0.07304700 | 0.18525000  |                                                           |
| C                     | 5.91459200  | -1.48704700 | 0.11235600  |                                                           |
| C                     | 4.69304700  | -2.08812800 | -0.00404300 |                                                           |

|                       |             |             |             |                                                           |
|-----------------------|-------------|-------------|-------------|-----------------------------------------------------------|
| C                     | -2.59937900 | 1.16817200  | -1.32173500 |                                                           |
| C                     | -3.84962800 | 1.74612700  | -1.23512300 |                                                           |
| C                     | -4.74495900 | 1.33170000  | -0.24671600 |                                                           |
| C                     | -4.38006900 | 0.33323400  | 0.66145500  |                                                           |
| C                     | -3.14278900 | -0.26919200 | 0.57822400  |                                                           |
| C                     | -0.15711300 | 2.19468900  | 0.02792200  |                                                           |
| C                     | -1.02890900 | 2.56272400  | 1.04943900  |                                                           |
| C                     | -1.31592100 | 3.90663000  | 1.25368500  |                                                           |
| C                     | -0.71635200 | 4.87892000  | 0.45945900  |                                                           |
| C                     | 0.17491900  | 4.50373700  | -0.54142800 |                                                           |
| C                     | 0.45458700  | 3.16107000  | -0.76480400 |                                                           |
| O                     | -0.28481300 | -3.60849200 | -1.25151900 |                                                           |
| O                     | -1.82302100 | -2.95603700 | 0.24842000  |                                                           |
| C                     | -2.64965300 | -4.07244500 | -0.11096200 |                                                           |
| C                     | -3.99110600 | -3.85965600 | 0.55423400  |                                                           |
| H                     | 4.94891200  | 1.79085200  | 0.19504200  |                                                           |
| H                     | 6.99441300  | 0.38578600  | 0.27883000  |                                                           |
| H                     | 6.81428000  | -2.08929700 | 0.14989700  |                                                           |
| H                     | 4.58150800  | -3.16403400 | -0.06276600 |                                                           |
| H                     | -1.88145500 | 1.50906300  | -2.05942200 |                                                           |
| H                     | -4.12295400 | 2.54114100  | -1.91788900 |                                                           |
| H                     | -5.71940100 | 1.79939600  | -0.17220000 |                                                           |
| H                     | -5.06900000 | 0.03649500  | 1.44321600  |                                                           |
| H                     | -2.83993100 | -1.03777500 | 1.27704900  |                                                           |
| H                     | -1.48114000 | 1.79912600  | 1.67169000  |                                                           |
| H                     | -2.00170900 | 4.19273500  | 2.04187000  |                                                           |
| H                     | -0.93672600 | 5.92652200  | 0.62498500  |                                                           |
| H                     | 0.65187200  | 5.25798700  | -1.15548800 |                                                           |
| H                     | 1.14481600  | 2.85356100  | -1.54015600 |                                                           |
| H                     | -2.73827600 | -4.09276400 | -1.19856500 |                                                           |
| H                     | -2.16183000 | -4.99403800 | 0.21433800  |                                                           |
| H                     | -4.65791500 | -4.69352800 | 0.32726200  |                                                           |
| H                     | -3.88066700 | -3.79247400 | 1.63863800  |                                                           |
| H                     | -4.44204900 | -2.93762600 | 0.18218200  |                                                           |
| O                     | -2.72925800 | -1.36088900 | -1.71840000 |                                                           |
| H                     | -3.02633100 | -0.84694100 | -2.48361500 |                                                           |
| <b>Name</b>           |             |             |             | <b>TS-C26-OH-RAF-G</b>                                    |
| Cartesian Coordinates |             |             |             | Energy                                                    |
| C                     | 1.24167800  | -1.07685200 | 0.11942100  | Zero-point correction= 0.399394 (Hartree/Particle)        |
| C                     | 1.42376000  | 0.34425800  | -0.01298300 | Thermal correction to Energy= 0.425044                    |
| N                     | 2.56865400  | 0.94956900  | -0.09971900 | Thermal correction to Enthalpy= 0.425989                  |
| C                     | 3.63653900  | 0.10605200  | -0.06867300 | Thermal correction to Gibbs Free Energy= 0.341661         |
| C                     | 3.47619800  | -1.31159200 | 0.03681800  | Sum of electronic and zero-point Energies= -1353.983195   |
| N                     | 2.25739200  | -1.90174800 | 0.12959500  | Sum of electronic and thermal Energies= -1353.957544      |
| C                     | -0.17977200 | -1.30201300 | 0.17941600  | Sum of electronic and thermal Enthalpies= -1353.956600    |
| C                     | -0.78455000 | -0.06729700 | 0.10374300  | Sum of electronic and thermal Free Energies= -1354.040927 |
| N                     | 0.16871800  | 0.93466800  | -0.01358600 |                                                           |
| C                     | -0.83898000 | -2.61944400 | 0.22292900  |                                                           |
| C                     | -2.22197300 | 0.23714600  | 0.12375100  |                                                           |
| C                     | 4.94402600  | 0.65025100  | -0.15243000 |                                                           |
| C                     | 6.03579600  | -0.17262400 | -0.13474800 |                                                           |
| C                     | 5.87956400  | -1.57989500 | -0.03362800 |                                                           |
| C                     | 4.63388900  | -2.13517400 | 0.05037900  |                                                           |
| C                     | -2.79543500 | 1.00806400  | -0.92282900 |                                                           |

|                       |             |             |             |                                                           |
|-----------------------|-------------|-------------|-------------|-----------------------------------------------------------|
| C                     | -4.17693900 | 1.31213100  | -0.85864000 |                                                           |
| C                     | -4.96919400 | 0.77017400  | 0.13212200  |                                                           |
| C                     | -4.40314000 | -0.05040400 | 1.11440600  |                                                           |
| C                     | -3.03707200 | -0.31356200 | 1.10626100  |                                                           |
| C                     | -0.06117300 | 2.34163000  | 0.02741700  |                                                           |
| C                     | -0.84913200 | 2.89106600  | 1.03488900  |                                                           |
| C                     | -1.08471900 | 4.26058400  | 1.04612800  |                                                           |
| C                     | -0.51939100 | 5.07663500  | 0.07144400  |                                                           |
| C                     | 0.28382000  | 4.51994900  | -0.91898400 |                                                           |
| C                     | 0.51203300  | 3.14957500  | -0.94953200 |                                                           |
| O                     | -0.42020500 | -3.58425300 | 0.79884800  |                                                           |
| O                     | -1.99321300 | -2.62394900 | -0.48081300 |                                                           |
| C                     | -2.80076400 | -3.80870400 | -0.37697400 |                                                           |
| C                     | -4.07071700 | -3.53953500 | -1.15345700 |                                                           |
| H                     | 5.03625500  | 1.72694100  | -0.22845300 |                                                           |
| H                     | 7.03170700  | 0.24925600  | -0.19814100 |                                                           |
| H                     | 6.75794300  | -2.21378300 | -0.02159400 |                                                           |
| H                     | 4.48204800  | -3.20464000 | 0.13147000  |                                                           |
| H                     | -2.15098400 | 1.59147400  | -1.56619500 |                                                           |
| H                     | -4.60625900 | 1.94261800  | -1.62671700 |                                                           |
| H                     | -6.03078700 | 0.98449200  | 0.15516200  |                                                           |
| H                     | -5.02608900 | -0.47211800 | 1.89405900  |                                                           |
| H                     | -2.59434200 | -0.93532500 | 1.87690400  |                                                           |
| H                     | -1.27280400 | 2.24927000  | 1.79798100  |                                                           |
| H                     | -1.70296000 | 4.68972400  | 1.82512500  |                                                           |
| H                     | -0.70025500 | 6.14451800  | 0.08673600  |                                                           |
| H                     | 0.73023700  | 5.15227700  | -1.67668000 |                                                           |
| H                     | 1.13125000  | 2.70122900  | -1.71577700 |                                                           |
| H                     | -2.23763500 | -4.65438400 | -0.77557800 |                                                           |
| H                     | -2.99596700 | -4.00212900 | 0.68055700  |                                                           |
| H                     | -4.74126100 | -4.39720900 | -1.07883500 |                                                           |
| H                     | -4.58098400 | -2.65849200 | -0.75763100 |                                                           |
| H                     | -3.85106500 | -3.36320900 | -2.20793900 |                                                           |
| O                     | -2.84182200 | -0.37720700 | -2.33722100 |                                                           |
| H                     | -2.64137900 | -1.16235200 | -1.79828900 |                                                           |
| <b>Name</b>           |             |             |             | <b>TS-C27-OH-RAF-G</b>                                    |
| Cartesian Coordinates |             |             |             | Energy                                                    |
| C                     | 1.23914300  | -1.07877600 | 0.10384400  | Zero-point correction= 0.399082 (Hartree/Particle)        |
| C                     | 1.42682400  | 0.34437200  | 0.00486700  | Thermal correction to Energy= 0.424868                    |
| N                     | 2.57288200  | 0.94935000  | -0.06364700 | Thermal correction to Enthalpy= 0.425812                  |
| C                     | 3.63934000  | 0.10337800  | -0.04376000 | Thermal correction to Gibbs Free Energy= 0.340969         |
| C                     | 3.47472000  | -1.31517800 | 0.03142900  | Sum of electronic and zero-point Energies= -1353.979276   |
| N                     | 2.25385800  | -1.90474300 | 0.10369900  | Sum of electronic and thermal Energies= -1353.953491      |
| C                     | -0.18545900 | -1.30103200 | 0.14885200  | Sum of electronic and thermal Enthalpies= -1353.952547    |
| C                     | -0.78312800 | -0.06280300 | 0.09750000  | Sum of electronic and thermal Free Energies= -1354.037390 |
| N                     | 0.17279300  | 0.93888700  | 0.00990000  |                                                           |
| C                     | -0.84236400 | -2.62016500 | 0.16898900  |                                                           |
| C                     | -2.22326800 | 0.24801100  | 0.10382300  |                                                           |
| C                     | 4.94837300  | 0.64632700  | -0.10774100 |                                                           |
| C                     | 6.03818000  | -0.17944700 | -0.09998600 |                                                           |
| C                     | 5.87786100  | -1.58797000 | -0.02894100 |                                                           |
| C                     | 4.63021500  | -2.14176400 | 0.03542500  |                                                           |
| C                     | -2.78161400 | 0.99625700  | -0.92140500 |                                                           |
| C                     | -4.18561100 | 1.14773600  | -1.00297500 |                                                           |

|                       |             |             |             |                                                           |
|-----------------------|-------------|-------------|-------------|-----------------------------------------------------------|
| C                     | -4.98429000 | 0.69672600  | 0.07690500  |                                                           |
| C                     | -4.41271300 | -0.01277800 | 1.11619200  |                                                           |
| C                     | -3.03926400 | -0.25729200 | 1.12363700  |                                                           |
| C                     | -0.05210700 | 2.34709600  | 0.05330600  |                                                           |
| C                     | -0.83844200 | 2.89881600  | 1.06059200  |                                                           |
| C                     | -1.06095200 | 4.27015700  | 1.07905500  |                                                           |
| C                     | -0.48556600 | 5.08632900  | 0.11019500  |                                                           |
| C                     | 0.31469600  | 4.52759100  | -0.88114900 |                                                           |
| C                     | 0.53079100  | 3.15529200  | -0.91755700 |                                                           |
| O                     | -0.36092500 | -3.61357600 | 0.64069500  |                                                           |
| O                     | -2.05863800 | -2.59508400 | -0.41546500 |                                                           |
| C                     | -2.81008900 | -3.81668400 | -0.33341500 |                                                           |
| C                     | -4.15296300 | -3.55899000 | -0.97864400 |                                                           |
| H                     | 5.04358300  | 1.72417100  | -0.16048100 |                                                           |
| H                     | 7.03548800  | 0.24119000  | -0.14783600 |                                                           |
| H                     | 6.75461000  | -2.22421800 | -0.02398800 |                                                           |
| H                     | 4.47512300  | -3.21225400 | 0.09371100  |                                                           |
| H                     | -2.15739700 | 1.39563500  | -1.71214600 |                                                           |
| H                     | -4.60030600 | 1.84736200  | -1.71486400 |                                                           |
| H                     | -6.05202900 | 0.87386700  | 0.05064900  |                                                           |
| H                     | -5.02866200 | -0.38596200 | 1.92532400  |                                                           |
| H                     | -2.58990100 | -0.83653000 | 1.92271200  |                                                           |
| H                     | -1.27179600 | 2.25645900  | 1.81766700  |                                                           |
| H                     | -1.67706800 | 4.70095900  | 1.85882500  |                                                           |
| H                     | -0.65619000 | 6.15579800  | 0.13116200  |                                                           |
| H                     | 0.76990400  | 5.15985600  | -1.63365400 |                                                           |
| H                     | 1.15217800  | 2.70665000  | -1.68199900 |                                                           |
| H                     | -2.25306300 | -4.60831100 | -0.83807200 |                                                           |
| H                     | -2.90745300 | -4.09641000 | 0.71831400  |                                                           |
| H                     | -4.77819700 | -4.45040000 | -0.90429900 |                                                           |
| H                     | -4.66865100 | -2.73328000 | -0.48259100 |                                                           |
| H                     | -4.03663200 | -3.31496400 | -2.03662000 |                                                           |
| O                     | -4.51016500 | -0.29793600 | -2.30970000 |                                                           |
| H                     | -3.93171500 | -0.97803200 | -1.92687500 |                                                           |
| <b>Name</b>           |             |             |             | <b>TS-C28-OH-RAF-G</b>                                    |
| Cartesian Coordinates |             |             |             | Energy                                                    |
| C                     | 1.29436000  | -1.14914300 | 0.03619500  | Zero-point correction= 0.398593 (Hartree/Particle)        |
| C                     | 1.43289500  | 0.28144000  | -0.01953800 | Thermal correction to Energy= 0.424700                    |
| N                     | 2.55546500  | 0.93229900  | -0.04302800 | Thermal correction to Enthalpy= 0.425644                  |
| C                     | 3.65265800  | 0.12706200  | -0.02317300 | Thermal correction to Gibbs Free Energy= 0.338513         |
| C                     | 3.53934400  | -1.29816200 | 0.01186600  | Sum of electronic and zero-point Energies= -1353.979878   |
| N                     | 2.34100700  | -1.93505500 | 0.04186100  | Sum of electronic and thermal Energies= -1353.953771      |
| C                     | -0.12361900 | -1.42585600 | 0.05317700  | Sum of electronic and thermal Enthalpies= -1353.952827    |
| C                     | -0.76599600 | -0.20728100 | 0.01309100  | Sum of electronic and thermal Free Energies= -1354.039958 |
| N                     | 0.15878400  | 0.82901900  | -0.02894900 |                                                           |
| C                     | -0.72488300 | -2.76947800 | 0.01558400  |                                                           |
| C                     | -2.20156100 | 0.12510100  | -0.01736800 |                                                           |
| C                     | 4.94142000  | 0.71963100  | -0.04368800 |                                                           |
| C                     | 6.06073700  | -0.06554800 | -0.03268100 |                                                           |
| C                     | 5.95178100  | -1.48058800 | -0.00109100 |                                                           |
| C                     | 4.72477700  | -2.08154400 | 0.02097300  |                                                           |
| C                     | -2.70290000 | 0.90247200  | -1.06928700 |                                                           |
| C                     | -4.02396700 | 1.30555900  | -1.06638300 |                                                           |
| C                     | -4.85299000 | 1.01540200  | 0.04358300  |                                                           |

|                       |             |             |             |                                                           |
|-----------------------|-------------|-------------|-------------|-----------------------------------------------------------|
| C                     | -4.35797000 | 0.15402200  | 1.05373000  |                                                           |
| C                     | -3.04746200 | -0.27099900 | 1.02768400  |                                                           |
| C                     | -0.12275400 | 2.22289600  | 0.09621200  |                                                           |
| C                     | -0.92000300 | 2.68095400  | 1.14293100  |                                                           |
| C                     | -1.21404200 | 4.03612200  | 1.23603800  |                                                           |
| C                     | -0.69754000 | 4.92999100  | 0.30182700  |                                                           |
| C                     | 0.12030300  | 4.46599400  | -0.72298300 |                                                           |
| C                     | 0.40797900  | 3.11000900  | -0.83303800 |                                                           |
| O                     | -0.12719400 | -3.79183700 | 0.21417000  |                                                           |
| O                     | -2.03786200 | -2.72420600 | -0.27781900 |                                                           |
| C                     | -2.71952000 | -3.98564100 | -0.31372700 |                                                           |
| C                     | -4.17478300 | -3.68921400 | -0.60002800 |                                                           |
| H                     | 4.99730200  | 1.80127900  | -0.06648600 |                                                           |
| H                     | 7.04248700  | 0.39251400  | -0.04746500 |                                                           |
| H                     | 6.85148300  | -2.08389900 | 0.00719100  |                                                           |
| H                     | 4.60803500  | -3.15813900 | 0.04779300  |                                                           |
| H                     | -2.04603600 | 1.18386400  | -1.88444400 |                                                           |
| H                     | -4.41786100 | 1.90143700  | -1.88010200 |                                                           |
| H                     | -5.91572400 | 1.20090300  | -0.02289700 |                                                           |
| H                     | -5.00747000 | -0.12258500 | 1.87467900  |                                                           |
| H                     | -2.65302200 | -0.89756700 | 1.81896100  |                                                           |
| H                     | -1.30717000 | 1.97946100  | 1.87293100  |                                                           |
| H                     | -1.83751300 | 4.39385700  | 2.04727500  |                                                           |
| H                     | -0.92613400 | 5.98590000  | 0.37866300  |                                                           |
| H                     | 0.53290400  | 5.15956000  | -1.44545300 |                                                           |
| H                     | 1.04124700  | 2.73412200  | -1.62673300 |                                                           |
| H                     | -2.26505100 | -4.60961800 | -1.08623800 |                                                           |
| H                     | -2.58143200 | -4.48968200 | 0.64534100  |                                                           |
| H                     | -4.74382700 | -4.61952900 | -0.64253900 |                                                           |
| H                     | -4.59756900 | -3.05616500 | 0.18192300  |                                                           |
| H                     | -4.27939000 | -3.17224800 | -1.55517500 |                                                           |
| O                     | -4.69238000 | 2.77230900  | 0.98420400  |                                                           |
| H                     | -3.75360100 | 2.95248300  | 0.81270000  |                                                           |
| <b>Name</b>           |             |             |             | <b>TS-C29-OH-RAF-G</b>                                    |
| Cartesian Coordinates |             |             |             | Energy                                                    |
| C                     | 1.28468200  | -1.12469600 | -0.04302000 | Zero-point correction= 0.398686 (Hartree/Particle)        |
| C                     | 1.42923100  | 0.30615700  | -0.02877200 | Thermal correction to Energy= 0.424670                    |
| N                     | 2.55277000  | 0.95476600  | 0.00338300  | Thermal correction to Enthalpy= 0.425614                  |
| C                     | 3.64721600  | 0.14547300  | 0.00986700  | Thermal correction to Gibbs Free Energy= 0.339845         |
| C                     | 3.52931500  | -1.27958600 | -0.01227100 | Sum of electronic and zero-point Energies= -1353.980111   |
| N                     | 2.32894100  | -1.91364600 | -0.03534800 | Sum of electronic and thermal Energies= -1353.954127      |
| C                     | -0.13554500 | -1.39585400 | -0.05777500 | Sum of electronic and thermal Enthalpies= -1353.953183    |
| C                     | -0.77240200 | -0.17336800 | -0.05259300 | Sum of electronic and thermal Free Energies= -1354.038953 |
| N                     | 0.15754900  | 0.85682100  | -0.03525800 |                                                           |
| C                     | -0.74045200 | -2.73120200 | -0.18543900 |                                                           |
| C                     | -2.20548300 | 0.18019400  | -0.14461000 |                                                           |
| C                     | 4.93779100  | 0.73380500  | 0.04016800  |                                                           |
| C                     | 6.05455000  | -0.05508100 | 0.04613200  |                                                           |
| C                     | 5.94107600  | -1.46986400 | 0.02307700  |                                                           |
| C                     | 4.71216700  | -2.06679700 | -0.00497800 |                                                           |
| C                     | -2.64976300 | 0.89070400  | -1.24904900 |                                                           |
| C                     | -3.98748600 | 1.34602700  | -1.31944500 |                                                           |
| C                     | -4.88734900 | 0.96122800  | -0.29595600 |                                                           |
| C                     | -4.43686200 | 0.24506200  | 0.79757400  |                                                           |



|                              |             |             |             |                                                           |
|------------------------------|-------------|-------------|-------------|-----------------------------------------------------------|
| C                            | -3.10059200 | -0.14710500 | 0.88026600  |                                                           |
| C                            | -0.12306400 | 2.24677800  | 0.13039800  |                                                           |
| C                            | -0.84534800 | 2.67701900  | 1.24042400  |                                                           |
| C                            | -1.13397500 | 4.02945800  | 1.38565200  |                                                           |
| C                            | -0.69075000 | 4.94409500  | 0.43401700  |                                                           |
| C                            | 0.04981500  | 4.50604200  | -0.65871500 |                                                           |
| C                            | 0.33549700  | 3.15475000  | -0.81609200 |                                                           |
| O                            | -0.12801700 | -3.74618600 | -0.37622300 |                                                           |
| O                            | -2.08191700 | -2.68885800 | -0.06953500 |                                                           |
| C                            | -2.77094200 | -3.93382800 | -0.24489600 |                                                           |
| C                            | -4.24559500 | -3.64311800 | -0.07442000 |                                                           |
| H                            | 4.99687600  | 1.81536900  | 0.05887000  |                                                           |
| H                            | 7.03761000  | 0.39983800  | 0.06933600  |                                                           |
| H                            | 6.83870200  | -2.07631900 | 0.02829900  |                                                           |
| H                            | 4.59199800  | -3.14321300 | -0.02293900 |                                                           |
| H                            | -1.96157400 | 1.14507800  | -2.04692800 |                                                           |
| H                            | -4.37549200 | 1.69958300  | -2.26422000 |                                                           |
| H                            | -5.92299100 | 1.26941000  | -0.36446800 |                                                           |
| H                            | -5.12301700 | -0.02112300 | 1.59248700  |                                                           |
| H                            | -2.74551100 | -0.71821500 | 1.72960900  |                                                           |
| H                            | -1.17630000 | 1.95443200  | 1.97725300  |                                                           |
| H                            | -1.70167900 | 4.36756100  | 2.24416400  |                                                           |
| H                            | -0.92152800 | 5.99624400  | 0.54613900  |                                                           |
| H                            | 0.39829200  | 5.21613800  | -1.39837100 |                                                           |
| H                            | 0.90817800  | 2.79688000  | -1.66277800 |                                                           |
| H                            | -2.54088500 | -4.32715900 | -1.23748700 |                                                           |
| H                            | -2.40210700 | -4.65060400 | 0.49173600  |                                                           |
| H                            | -4.82646300 | -4.55505100 | -0.22281000 |                                                           |
| H                            | -4.44815500 | -3.26179700 | 0.92810000  |                                                           |
| H                            | -4.57375600 | -2.89568000 | -0.79901500 |                                                           |
| O                            | -3.68266300 | 3.25282500  | -0.88301200 |                                                           |
| H                            | -3.03655300 | 3.16741100  | -0.16307000 |                                                           |
| <b>Name</b>                  |             |             |             | <b>TS-C30-OH-RAF-G</b>                                    |
| <b>Cartesian Coordinates</b> |             |             |             | <b>Energy</b>                                             |
| C                            | 1.25028400  | -1.07829200 | 0.12100400  | Zero-point correction= 0.399395 (Hartree/Particle)        |
| C                            | 1.43350500  | 0.34272200  | -0.01086900 | Thermal correction to Energy= 0.425045                    |
| N                            | 2.57894800  | 0.94736700  | -0.09493800 | Thermal correction to Enthalpy= 0.425990                  |
| C                            | 3.64626300  | 0.10322000  | -0.06150500 | Thermal correction to Gibbs Free Energy= 0.341660         |
| C                            | 3.48485200  | -1.31433400 | 0.04352700  | Sum of electronic and zero-point Energies= -1353.983194   |
| N                            | 2.26549000  | -1.90378200 | 0.13345800  | Sum of electronic and thermal Energies= -1353.957544      |
| C                            | -0.17143600 | -1.30261900 | 0.17770500  | Sum of electronic and thermal Enthalpies= -1353.956599    |
| C                            | -0.77530900 | -0.06753800 | 0.10075000  | Sum of electronic and thermal Free Energies= -1354.040929 |
| N                            | 0.17881700  | 0.93387000  | -0.01430500 |                                                           |
| C                            | -0.83152500 | -2.61966200 | 0.21958300  |                                                           |
| C                            | -2.21259500 | 0.23775500  | 0.11748900  |                                                           |
| C                            | 4.95425600  | 0.64666500  | -0.14222400 |                                                           |
| C                            | 6.04550300  | -0.17684600 | -0.12208500 |                                                           |
| C                            | 5.88821800  | -1.58403300 | -0.02142100 |                                                           |
| C                            | 4.64203200  | -2.13859100 | 0.05969100  |                                                           |
| C                            | -2.78321000 | 1.00906100  | -0.93036000 |                                                           |
| C                            | -4.16468800 | 1.31390100  | -0.86932600 |                                                           |
| C                            | -4.95951800 | 0.77234700  | 0.11959400  |                                                           |
| C                            | -4.39618400 | -0.04858500 | 1.10314200  |                                                           |
| C                            | -3.03025100 | -0.31252100 | 1.09811400  |                                                           |

|                       |             |             |             |                                                           |
|-----------------------|-------------|-------------|-------------|-----------------------------------------------------------|
| C                     | -0.05033700 | 2.34096500  | 0.02630600  |                                                           |
| C                     | -0.84031200 | 2.89076000  | 1.03200000  |                                                           |
| C                     | -1.07511000 | 4.26041800  | 1.04284200  |                                                           |
| C                     | -0.50703400 | 5.07623700  | 0.06956300  |                                                           |
| C                     | 0.29814100  | 4.51918000  | -0.91905800 |                                                           |
| C                     | 0.52561300  | 3.14867400  | -0.94922400 |                                                           |
| O                     | -0.41462500 | -3.58478200 | 0.79633800  |                                                           |
| O                     | -1.98417000 | -2.62340400 | -0.48676400 |                                                           |
| C                     | -2.79267600 | -3.80767500 | -0.38484200 |                                                           |
| C                     | -4.06076000 | -3.53762400 | -1.16406900 |                                                           |
| H                     | 5.04728700  | 1.72330600  | -0.21796000 |                                                           |
| H                     | 7.04180300  | 0.24445700  | -0.18315300 |                                                           |
| H                     | 6.76619800  | -2.21843300 | -0.00742500 |                                                           |
| H                     | 4.48938500  | -3.20797400 | 0.14036300  |                                                           |
| H                     | -2.13694600 | 1.59215100  | -1.57219800 |                                                           |
| H                     | -4.59189000 | 1.94465900  | -1.63836200 |                                                           |
| H                     | -6.02104200 | 0.98726000  | 0.14020300  |                                                           |
| H                     | -5.02115700 | -0.46997600 | 1.88134800  |                                                           |
| H                     | -2.58963900 | -0.93457000 | 1.86973900  |                                                           |
| H                     | -1.26614600 | 2.24913100  | 1.79402800  |                                                           |
| H                     | -1.69490300 | 4.68984400  | 1.82044600  |                                                           |
| H                     | -0.68729500 | 6.14422600  | 0.08455100  |                                                           |
| H                     | 0.74669400  | 5.15132500  | -1.67564500 |                                                           |
| H                     | 1.14634500  | 2.70004200  | -1.71407500 |                                                           |
| H                     | -2.22919400 | -4.65365100 | -0.78231800 |                                                           |
| H                     | -2.99030900 | -4.00111600 | 0.67223400  |                                                           |
| H                     | -4.73200500 | -4.39488500 | -1.09101600 |                                                           |
| H                     | -4.57133700 | -2.65630400 | -0.76925800 |                                                           |
| H                     | -3.83869600 | -3.36130900 | -2.21804800 |                                                           |
| O                     | -2.82716100 | -0.37607500 | -2.34496000 |                                                           |
| H                     | -2.62838500 | -1.16137400 | -1.80563500 |                                                           |
| <b>Name</b>           |             |             |             | <b>TS-N10-OH-RAF-G</b>                                    |
| Cartesian Coordinates |             |             |             | Energy                                                    |
| C                     | 1.30435600  | -1.06884100 | -0.08256700 | Zero-point correction= 0.400104 (Hartree/Particle)        |
| C                     | 1.46537300  | 0.34609900  | -0.07160300 | Thermal correction to Energy= 0.425531                    |
| N                     | 2.59244700  | 0.99794800  | -0.04317000 | Thermal correction to Enthalpy= 0.426475                  |
| C                     | 3.68842900  | 0.18608400  | -0.03436300 | Thermal correction to Gibbs Free Energy= 0.342264         |
| C                     | 3.59235500  | -1.23464200 | -0.07554500 | Sum of electronic and zero-point Energies= -1353.977514   |
| N                     | 2.37065000  | -1.86375800 | -0.10298600 | Sum of electronic and thermal Energies= -1353.952087      |
| C                     | -0.10430300 | -1.34100600 | -0.08259600 | Sum of electronic and thermal Enthalpies= -1353.951143    |
| C                     | -0.74512100 | -0.11154400 | -0.06743000 | Sum of electronic and thermal Free Energies= -1354.035355 |
| N                     | 0.19190700  | 0.90493400  | -0.05843900 |                                                           |
| C                     | -0.69305300 | -2.68160800 | -0.18054300 |                                                           |
| C                     | -2.18441800 | 0.21744300  | -0.09230300 |                                                           |
| C                     | 4.97639800  | 0.77552000  | 0.02030600  |                                                           |
| C                     | 6.09965800  | -0.00690200 | 0.01666900  |                                                           |
| C                     | 5.99407700  | -1.41720600 | -0.04470900 |                                                           |
| C                     | 4.76521000  | -2.02039900 | -0.09234000 |                                                           |
| C                     | -2.68978300 | 1.02563400  | -1.11133800 |                                                           |
| C                     | -4.03818900 | 1.36129400  | -1.13092600 |                                                           |
| C                     | -4.88438500 | 0.90517900  | -0.12557600 |                                                           |
| C                     | -4.38060900 | 0.10636000  | 0.89764000  |                                                           |
| C                     | -3.03634300 | -0.24078300 | 0.91275800  |                                                           |
| C                     | -0.05801600 | 2.30597100  | 0.06640300  |                                                           |

|   |             |             |             |
|---|-------------|-------------|-------------|
| C | -0.86409600 | 2.78329200  | 1.09516300  |
| C | -1.10870000 | 4.14735500  | 1.19257800  |
| C | -0.53625200 | 5.02853500  | 0.28054300  |
| C | 0.28402300  | 4.54273300  | -0.73269500 |
| C | 0.52361900  | 3.17865900  | -0.84702900 |
| O | -0.05374200 | -3.70761000 | -0.15417100 |
| O | -2.02431100 | -2.66217600 | -0.30499100 |
| C | -2.67348700 | -3.93704100 | -0.42903100 |
| C | -4.15865600 | -3.66296100 | -0.50528000 |
| H | 5.02865900  | 1.85671500  | 0.06001600  |
| H | 7.07921100  | 0.45440600  | 0.05553200  |
| H | 6.89291900  | -2.02136600 | -0.05868800 |
| H | 4.64744900  | -3.09359900 | -0.16563600 |
| H | -2.02503100 | 1.38826800  | -1.88743900 |
| H | -4.42584700 | 1.98247700  | -1.92917900 |
| H | -5.93422400 | 1.17305800  | -0.13736300 |
| H | -5.03664600 | -0.24685800 | 1.68444800  |
| H | -2.63881100 | -0.86897500 | 1.70122900  |
| H | -1.29882400 | 2.08959500  | 1.80442200  |
| H | -1.74141400 | 4.52119500  | 1.98824600  |
| H | -0.72495000 | 6.09205400  | 0.36272900  |
| H | 0.73787000  | 5.22588200  | -1.44022200 |
| H | 1.16267700  | 2.78536600  | -1.62734700 |
| H | -2.29792600 | -4.43446300 | -1.32564900 |
| H | -2.40857600 | -4.55341000 | 0.43233500  |
| H | -4.70437500 | -4.60060900 | -0.62367700 |
| H | -4.50486700 | -3.16954100 | 0.40427800  |
| H | -4.38488700 | -3.01550700 | -1.35388800 |
| O | 2.37187000  | -2.99499100 | -1.47163800 |
| H | 1.73818600  | -3.61614600 | -1.07742100 |

## References

1. E. Pollak and P. Pechukas, *J. Am. Chem. Soc.*, 1978, **100**, 2984-2991.
2. A. Fernández-Ramos, B. A. Ellingson, R. Meana-Pañeda, J. M. Marques and D. G. Truhlar, *Theor. Chem. Acc.*, 2007, **118**, 813-826.
3. C. Eckart, *Phy. Rev.*, 1930, **35**, 1303.
4. R. A. Marcus, *Annu. Rev. Phys. Chem.*, 1964, **15**, 155-196.
5. R. A. Marcus, *Rev. Mod. Phys.*, 1993, **65**, 599.
6. Y. Lu, A. Wang, P. Shi and H. Zhang, *PloS one*, 2017, **12**, e0169773.
7. Y. Lu, A. Wang, P. Shi, H. Zhang and Z. Li, *PloS one*, 2015, **10**, e0133259.
8. S. F. Nelsen, S. C. Blackstock and Y. Kim, *J. Am. Chem. Soc.*, 1987, **109**, 677-682.
9. S. F. Nelsen, M. N. Weaver, Y. Luo, J. R. Pladziewicz, L. K. Ausman, T. L. Jentzsch and J. J. O'Konek, *J. Phys. Chem. A*, 2006, **110**, 11665-11676.
10. A. Galano and J. R. Alvarez-Idaboy, *J. Comput. Chem.*, 2013, **34**, 2430-2445.
11. F. C. Collins and G. E. Kimball, *J. Colloid Sci.*, 1949, **4**, 425-437.
12. M. Von Smoluchowski, *Z. Phys. Chem*, 1917, **92**, 129-168.
13. D. G. Truhlar, *J. Chem. Educ.*, 1985, **62**, 104.
14. A. Einstein, *Ann. Phys.*, 1905, **17**, 549-560.
15. G. G. Stokes, *Mathematical and Physical Papers*, University Press, Cambridge, 1905.
16. A. Galano and J. Raúl Alvarez-Idaboy, *Int. J. Quantum Chem.*, 2019, **119**, e25665.
17. Q. V. Vo, T. V. Gon, M. V. Bay and A. Mechler, *J. Phys. Chem. B*, 2019, **123**, 10672-10679.
18. Q. V. Vo, M. V. Bay, P. C. Nam, D. T. Quang, M. Flavel, N. T. Hoa and A. Mechler, *J. Org. Chem.*, 2020, **85**, 15514-15520.
19. Y. Okuno, *Chem.: Eur. J.*, 1997, **3**, 212-218.
20. S. Benson, *The foundations of chemical kinetics*, Malabar, Florida, 1982.
21. C. Iuga, J. R. Alvarez-Idaboy and A. Vivier-Bunge, *J. Phys. Chem. B*, 2011, **115**, 12234-12246.
22. J. R. Alvarez-Idaboy, L. Reyes and N. Mora-Diez, *Org. Biomol. Chem.*, 2007, **5**, 3682-3689.
23. T. H. Le, T. T. Tran and L. K. Huynh, *Chemom. Intell. Lab. Syst.*, 2018, **172**, 10-16.
